# Supplementary material for: Scanning Electron Microscopy and Triple TOF-LC-MS-MS Analysis of Polyphenols from PEF-Treated Edible Mushrooms (L. edodes, A. brunnescens, and P. ostreatus)
Source: MDPI journal article supplement (doi:10.3390/antiox12122080), 2023-12-06
Supplement: s1 [file s1]

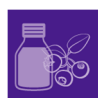

## Supplementary Material

Table S1. Phenolic compounds quantified and identified in pulsed electric fields (PEF) extracts and conventional extracts from *Agaricus bisporus*, *Agaricus brunnescens*, *Lentinula edodes* and *Pleurotus ostreatus* mushrooms by Triple TOF-LC-MS-MS.

| Compound         | Sample                | Treatment    | Retention time (min) | Concentration (ppm)* |
|------------------|-----------------------|--------------|----------------------|----------------------|
| Cinnamic acid    | <i>A. bisporus</i>    | Conventional | 1.62                 | 0.254                |
|                  |                       | PEF          | 1.64                 | 0.303                |
|                  | <i>A. brunnescens</i> | Conventional | 1.55                 | 0.212                |
|                  |                       | PEF          | 1.56                 | 0.256                |
|                  | <i>L. edodes</i>      | Conventional | 1.59                 | 0.164                |
|                  |                       | PEF          | 1.60                 | 0.209                |
|                  | <i>P. ostreatus</i>   | Conventional | 1.55                 | 0.197                |
|                  |                       | PEF          | 1.58                 | 0.242                |
| Chlorogenic acid | <i>A. bisporus</i>    | Conventional | 8.39                 | 0.155                |
|                  |                       | PEF          | 8.37                 | 0.159                |
|                  | <i>A. brunnescens</i> | Conventional | n.d                  | n.d                  |
|                  |                       | PEF          | n.d                  | n.d                  |
|                  | <i>L. edodes</i>      | Conventional | n.d                  | n.d                  |
|                  |                       | PEF          | n.d                  | n.d                  |
|                  | <i>P. ostreatus</i>   | Conventional | 8.34                 | 0.157                |
|                  |                       | PEF          | n.d                  | n.d                  |
| Vanillic acid    | <i>A. bisporus</i>    | Conventional | n.d                  | n.d                  |
|                  |                       | PEF          | n.d                  | n.d                  |
|                  | <i>A. brunnescens</i> | Conventional | n.d                  | n.d                  |
|                  |                       | PEF          | n.d                  | n.d                  |
|                  | <i>L. edodes</i>      | Conventional | 10.56                | 0.210                |
|                  |                       | PEF          | 10.41                | 0.165                |
|                  | <i>P. ostreatus</i>   | Conventional | n.d                  | n.d                  |
|                  |                       | PEF          | n.d                  | n.d                  |
| Ellagic acid     | <i>A. bisporus</i>    | Conventional | n.d                  | n.d                  |
|                  |                       | PEF          | n.d                  | n.d                  |
|                  | <i>A. brunnescens</i> | Conventional | n.d                  | n.d                  |
|                  |                       | PEF          | n.d                  | n.d                  |
|                  | <i>L. edodes</i>      | Conventional | n.d                  | n.d                  |
|                  |                       | PEF          | n.d                  | n.d                  |

|            |                       |              |       |          |
|------------|-----------------------|--------------|-------|----------|
|            | <i>P. ostreatus</i>   | Conventional | 8.51  | 0.162    |
|            |                       | PEF          | 8.41  | 0.161    |
| Thymol     | <i>A. bisporus</i>    | Conventional | 13.52 | 0.170    |
|            |                       | PEF          | 13.42 | 0.179    |
|            | <i>A. brunnescens</i> | Conventional | 13.57 | 0.171    |
|            |                       | PEF          | 13.66 | 0.179    |
|            | <i>L. edodes</i>      | Conventional | 13.67 | 0.176    |
|            |                       | PEF          | 13.33 | 0.169    |
|            | <i>P. ostreatus</i>   | Conventional | 13.65 | 0.184    |
|            |                       | PEF          | n.d   | n.d      |
| Hesperidin | <i>A. bisporus</i>    | Conventional | 8.88  | 7.21E-02 |
|            |                       | PEF          | 8.87  | 7.24E-02 |
|            | <i>A. brunnescens</i> | Conventional | n.d   | n.d      |
|            |                       | PEF          | 8.91  | 7.27E-02 |
|            | <i>L. edodes</i>      | Conventional | 8.91  | 7.25E-02 |
|            |                       | PEF          | 9.03  | 7.28E-02 |
|            | <i>P. ostreatus</i>   | Conventional | n.d   | n.d      |
|            |                       | PEF          | 8.91  | 7.27E-02 |
| Quercetin  | <i>A. bisporus</i>    | Conventional | 8.5   | 3.62E-02 |
|            |                       | PEF          | 8.49  | 4.53E-02 |
|            | <i>A. brunnescens</i> | Conventional | 8.4   | 3.23E-02 |
|            |                       | PEF          | 8.46  | 4.54E-02 |
|            | <i>L. edodes</i>      | Conventional | 8.49  | 3.84E-02 |
|            |                       | PEF          | 8.6   | 3.97E-02 |
|            | <i>P. ostreatus</i>   | Conventional | 8.41  | 3.13E-02 |
|            |                       | PEF          | 8.51  | 3.56E-02 |
| Kaempferol | <i>A. bisporus</i>    | Conventional | 10.32 | 2.31E-03 |
|            |                       | PEF          | 10.31 | 1.36E-03 |
|            | <i>A. brunnescens</i> | Conventional | 10.29 | 4.89E-03 |
|            |                       | PEF          | 11.69 | 3.14E-03 |
|            | <i>L. edodes</i>      | Conventional | 10.43 | 6.77E-03 |
|            |                       | PEF          | 10.22 | 1.70E-02 |
|            | <i>P. ostreatus</i>   | Conventional | 11.68 | 3.64E-03 |
|            |                       | PEF          | 11.76 | 2.27E-02 |

\* Phenolic compounds quantification was carried out considering a relative standard deviation (RSD%) of a maximum of 10%.

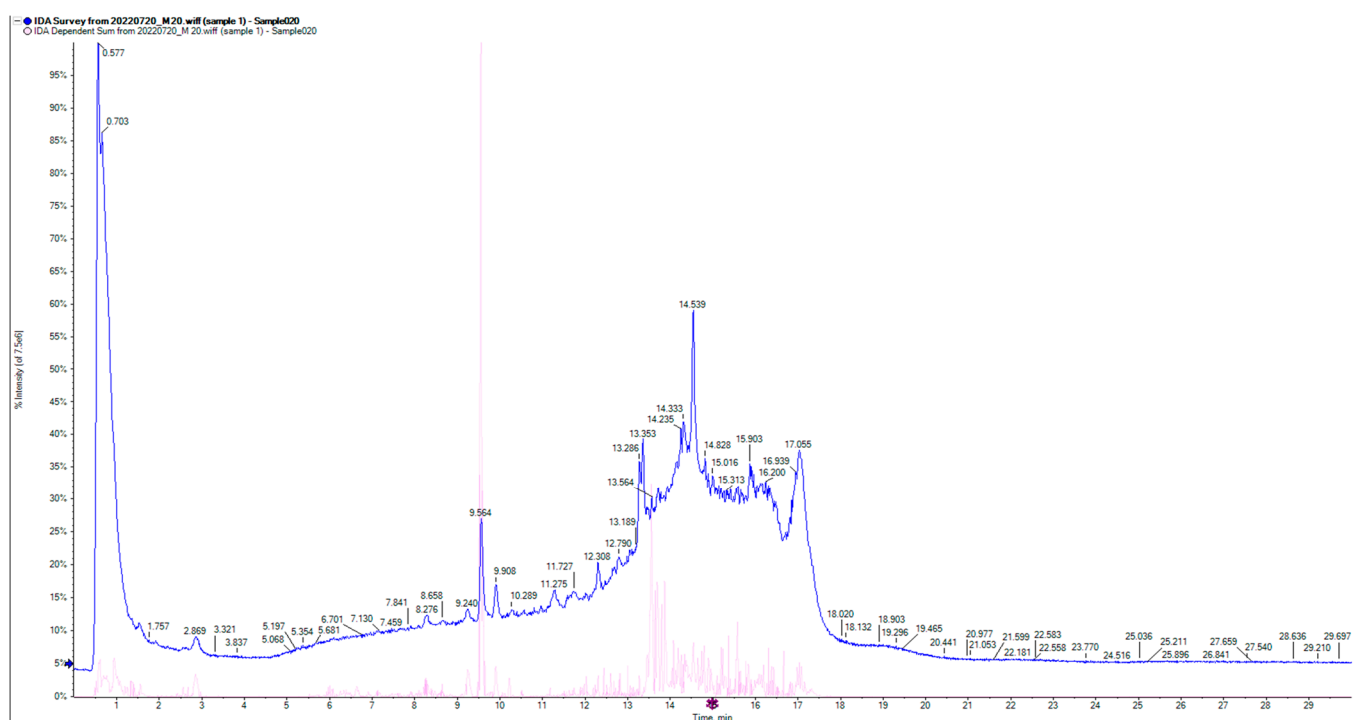

(A)

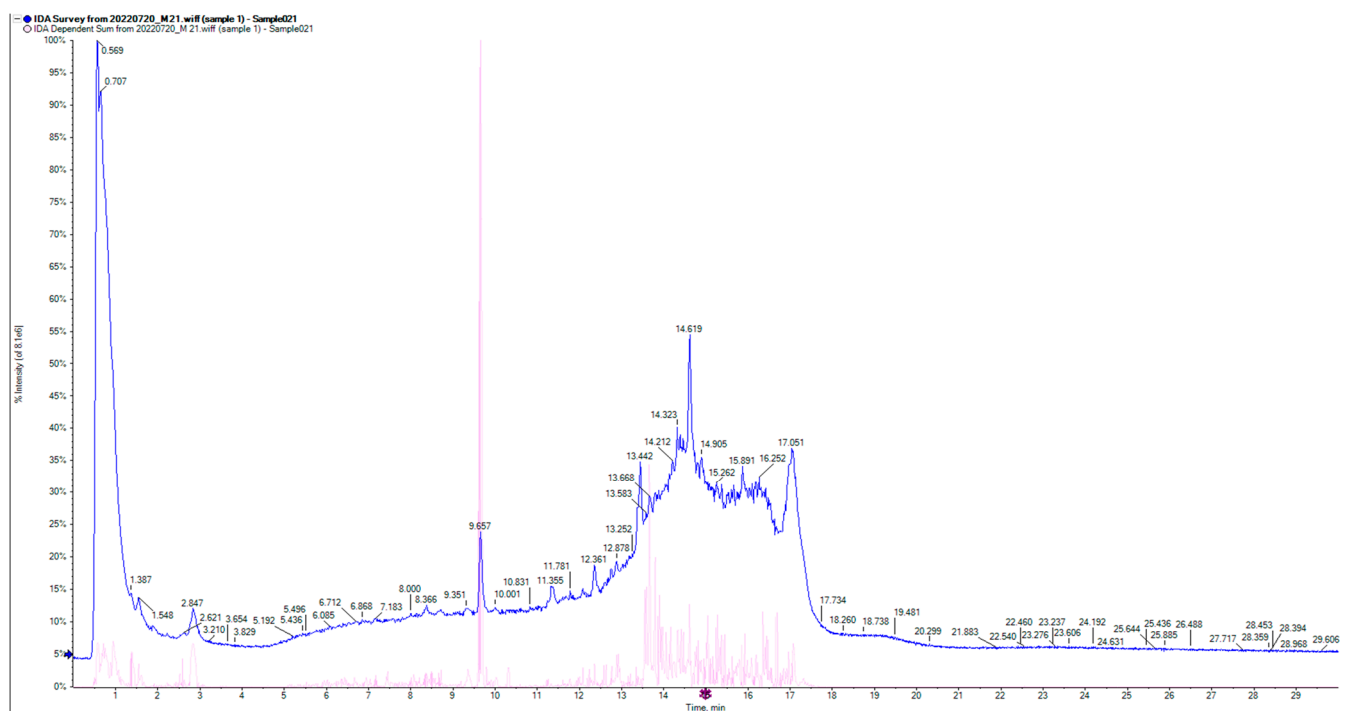

(B)

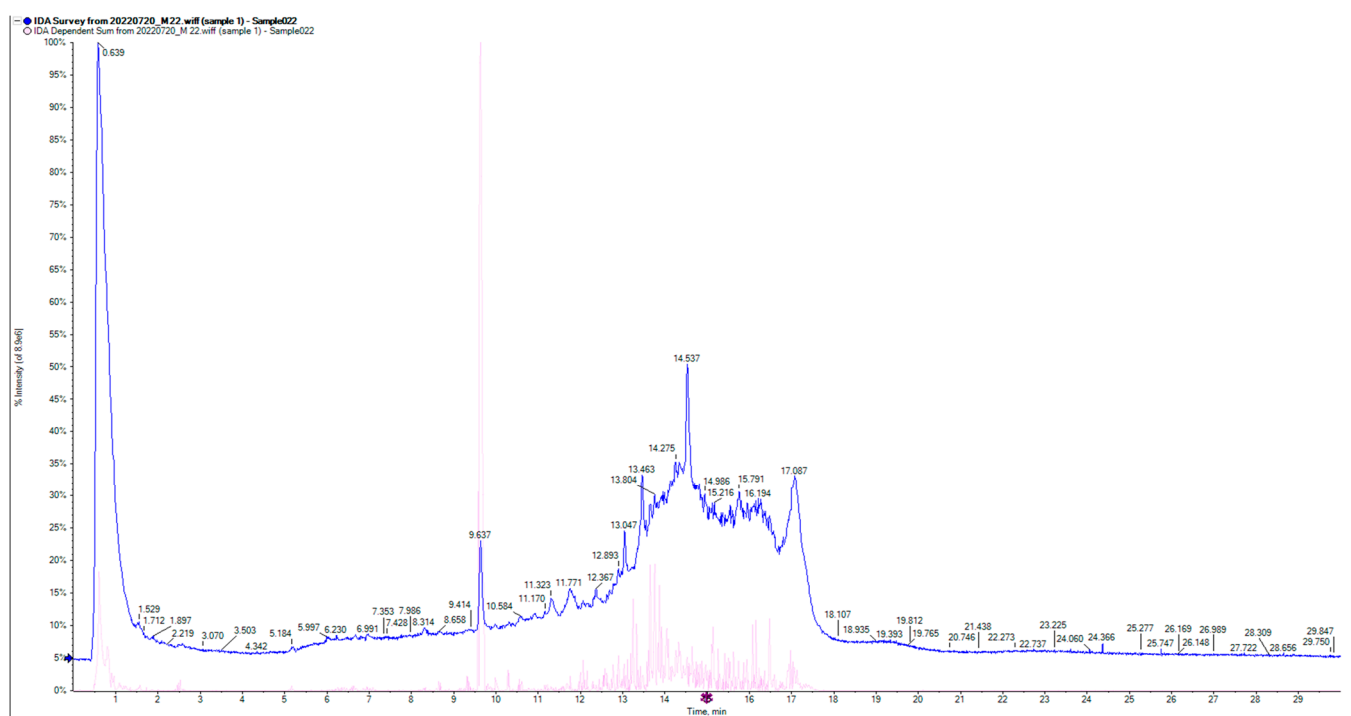

(C)

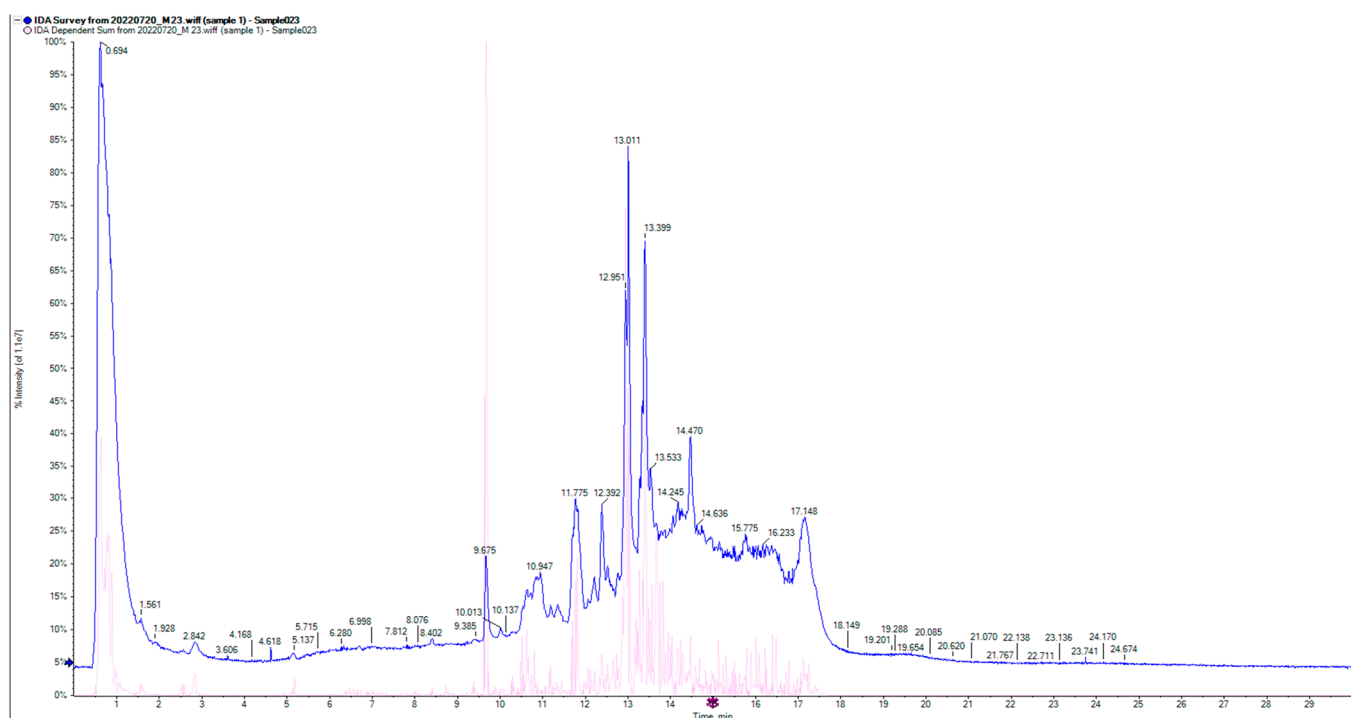

(D)

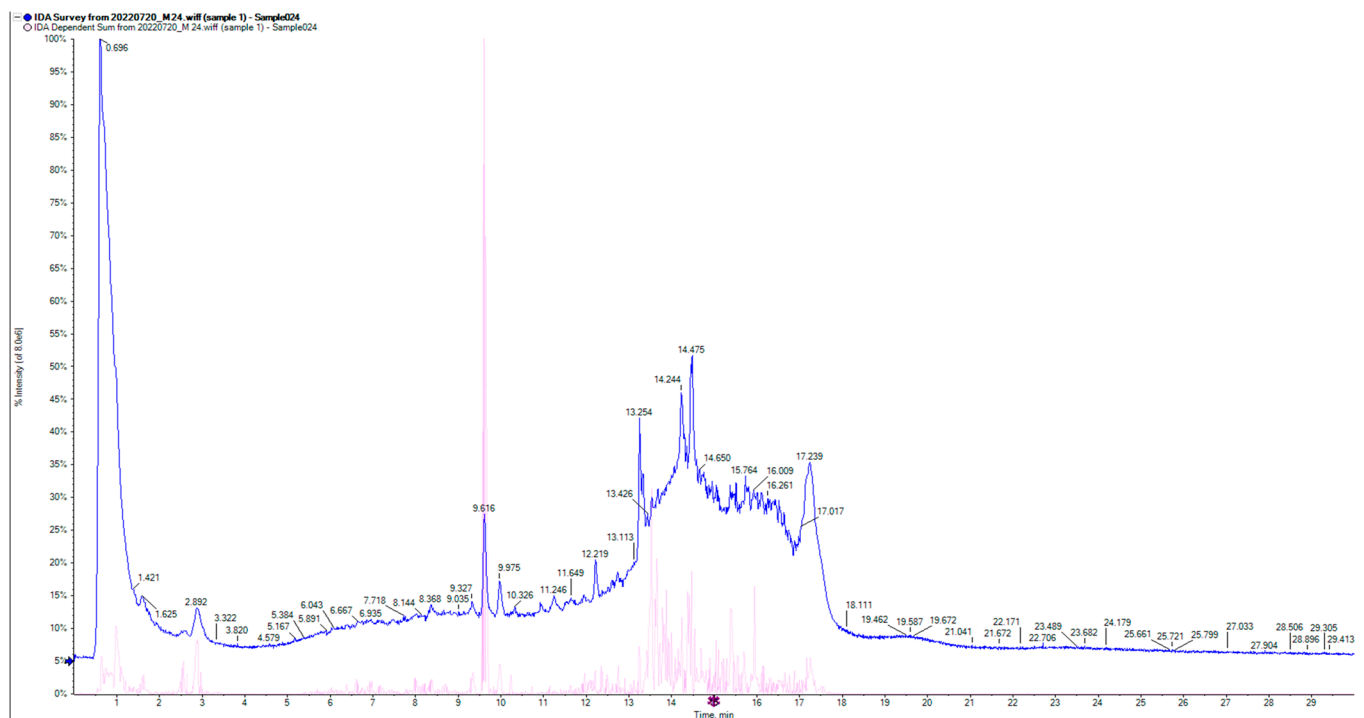

(E)

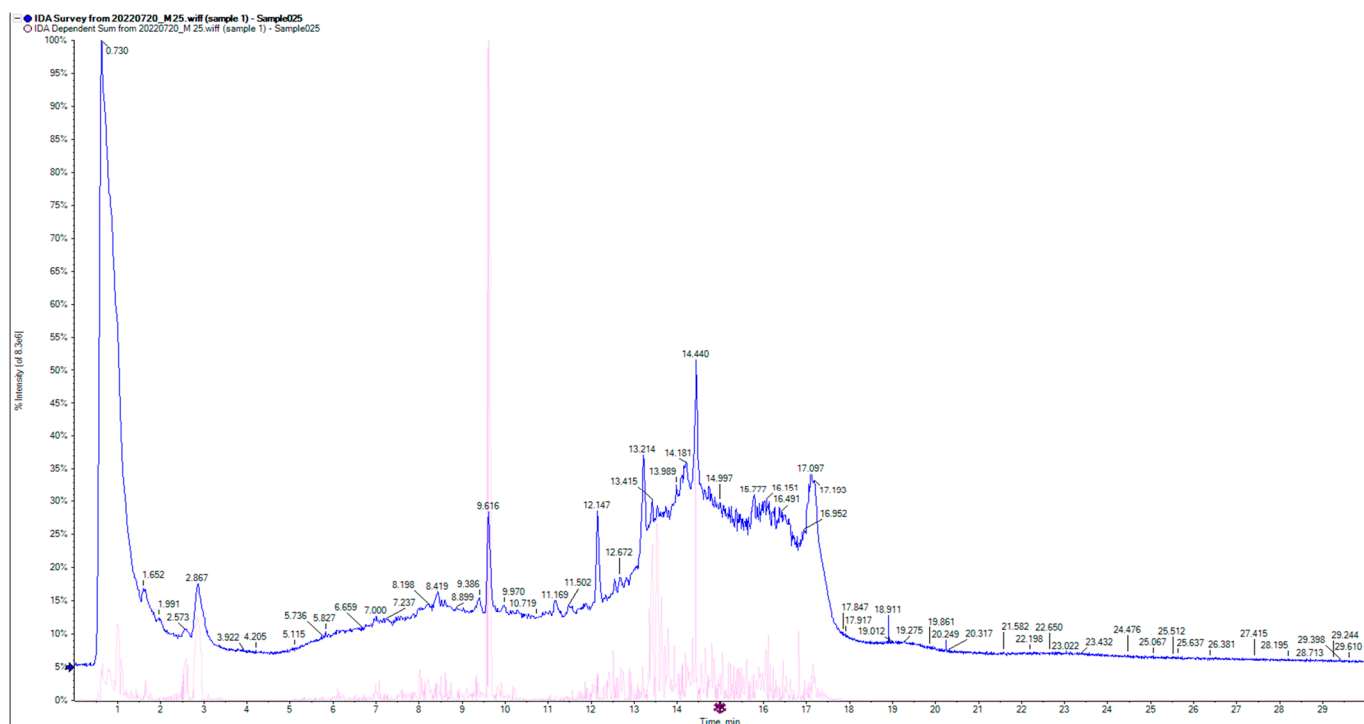

(F)

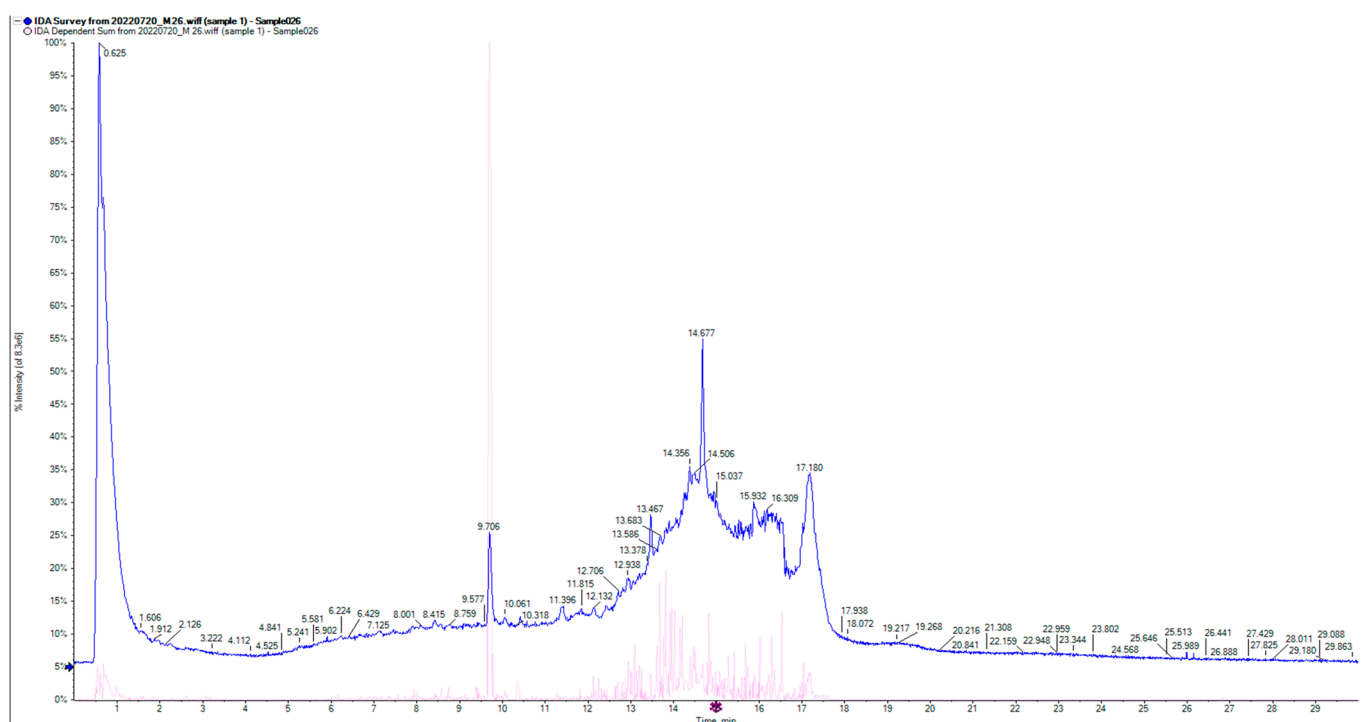

(G)

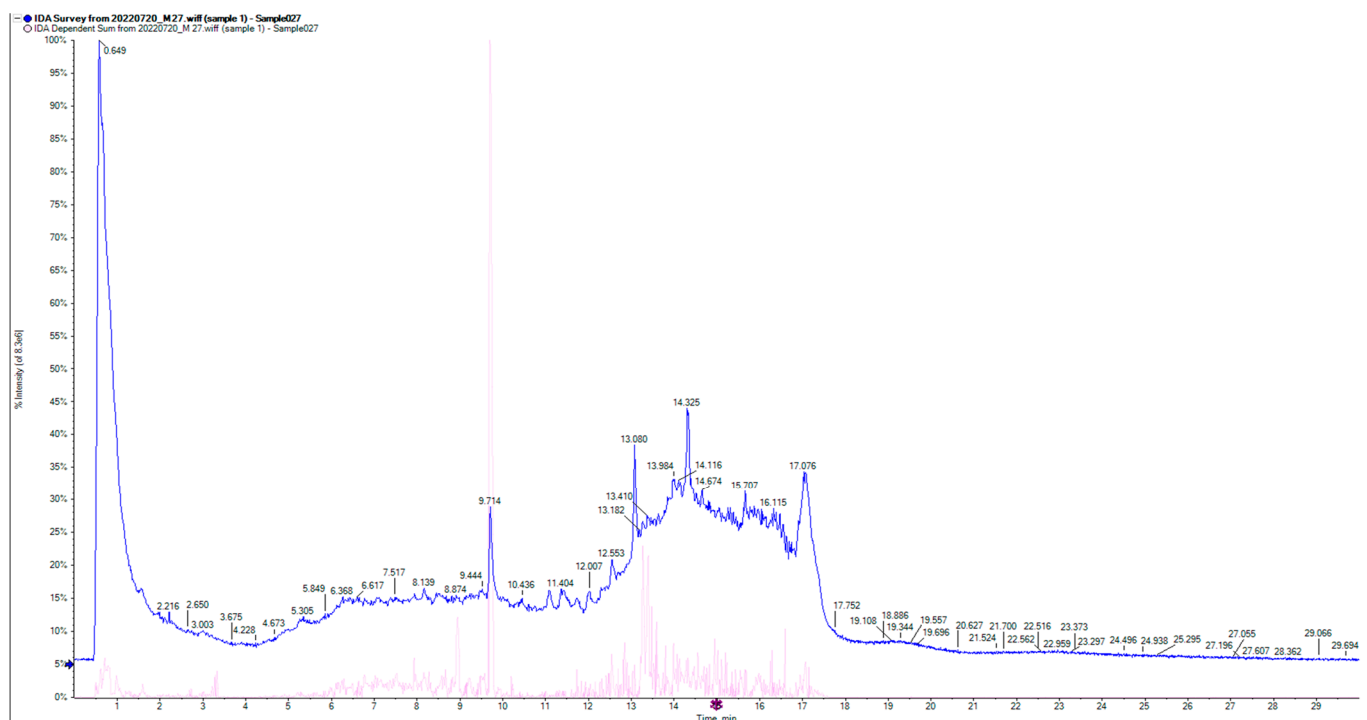

(H)

**Figure S1.** LC- MS/MS IDA Survey from (A) *A. brunnescens* conventional extract, (B) *A. brunnescens* PEF extract, (C) *P. ostreatus* conventional extract, (D) *P. ostreatus* PEF extract, (E) *A. bisporus* conventional extract, (F) *A. bisporus* PEF extract, (G) *L. edodes* conventional extract, (H) *L. edodes* PEF extract.

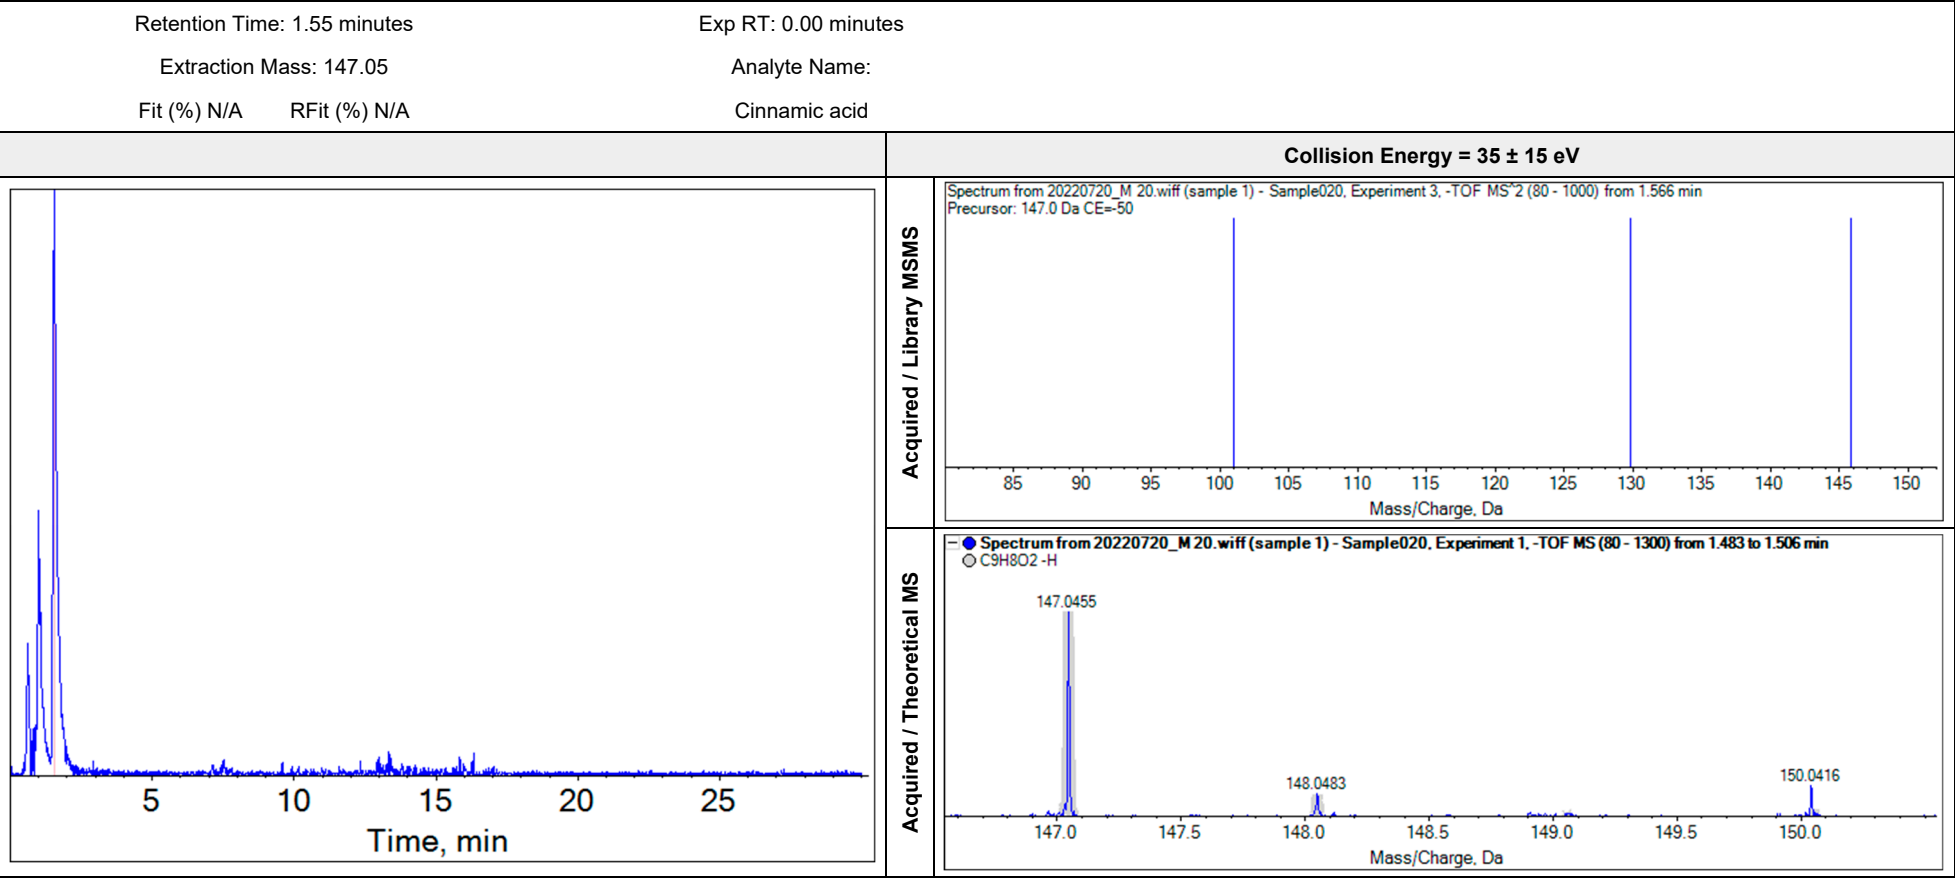

(A)

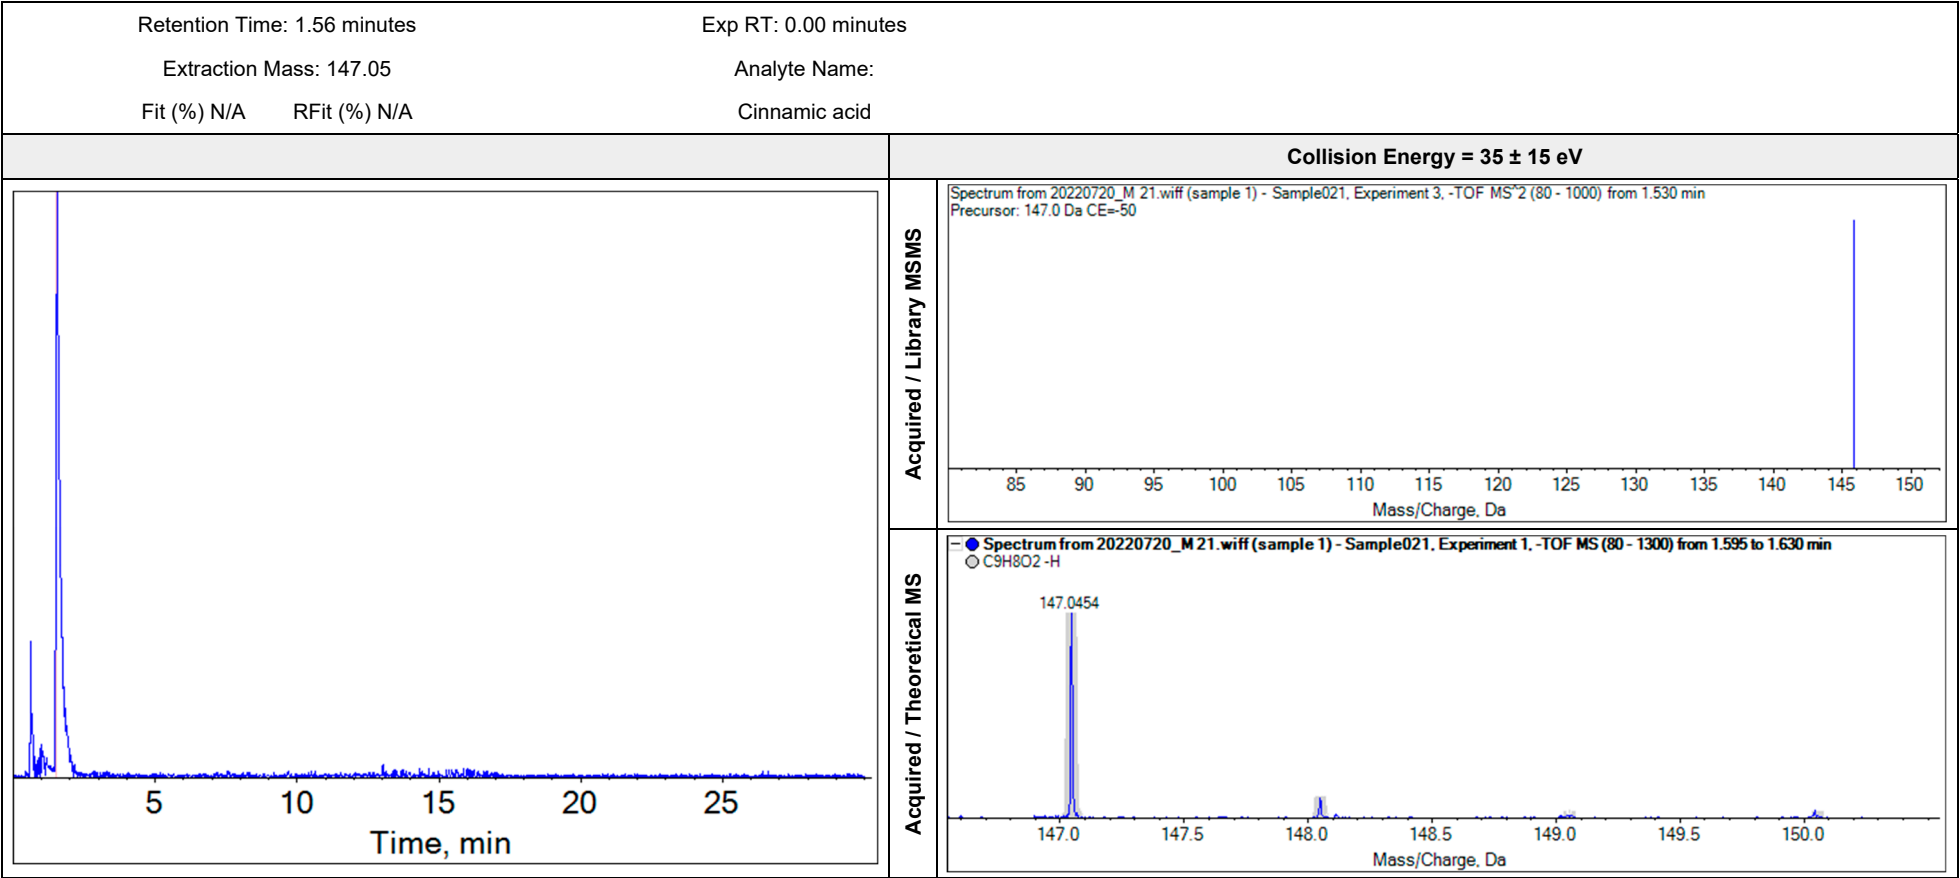

(B)

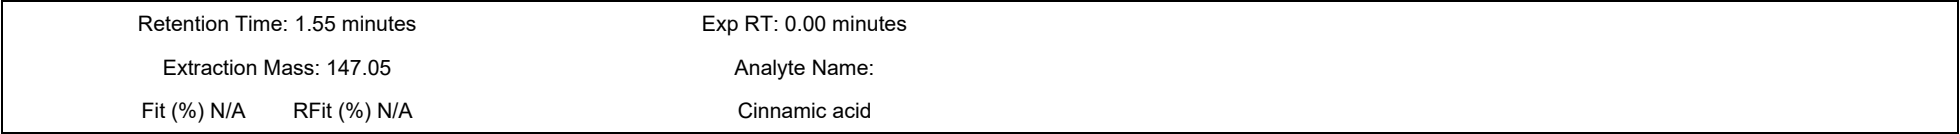



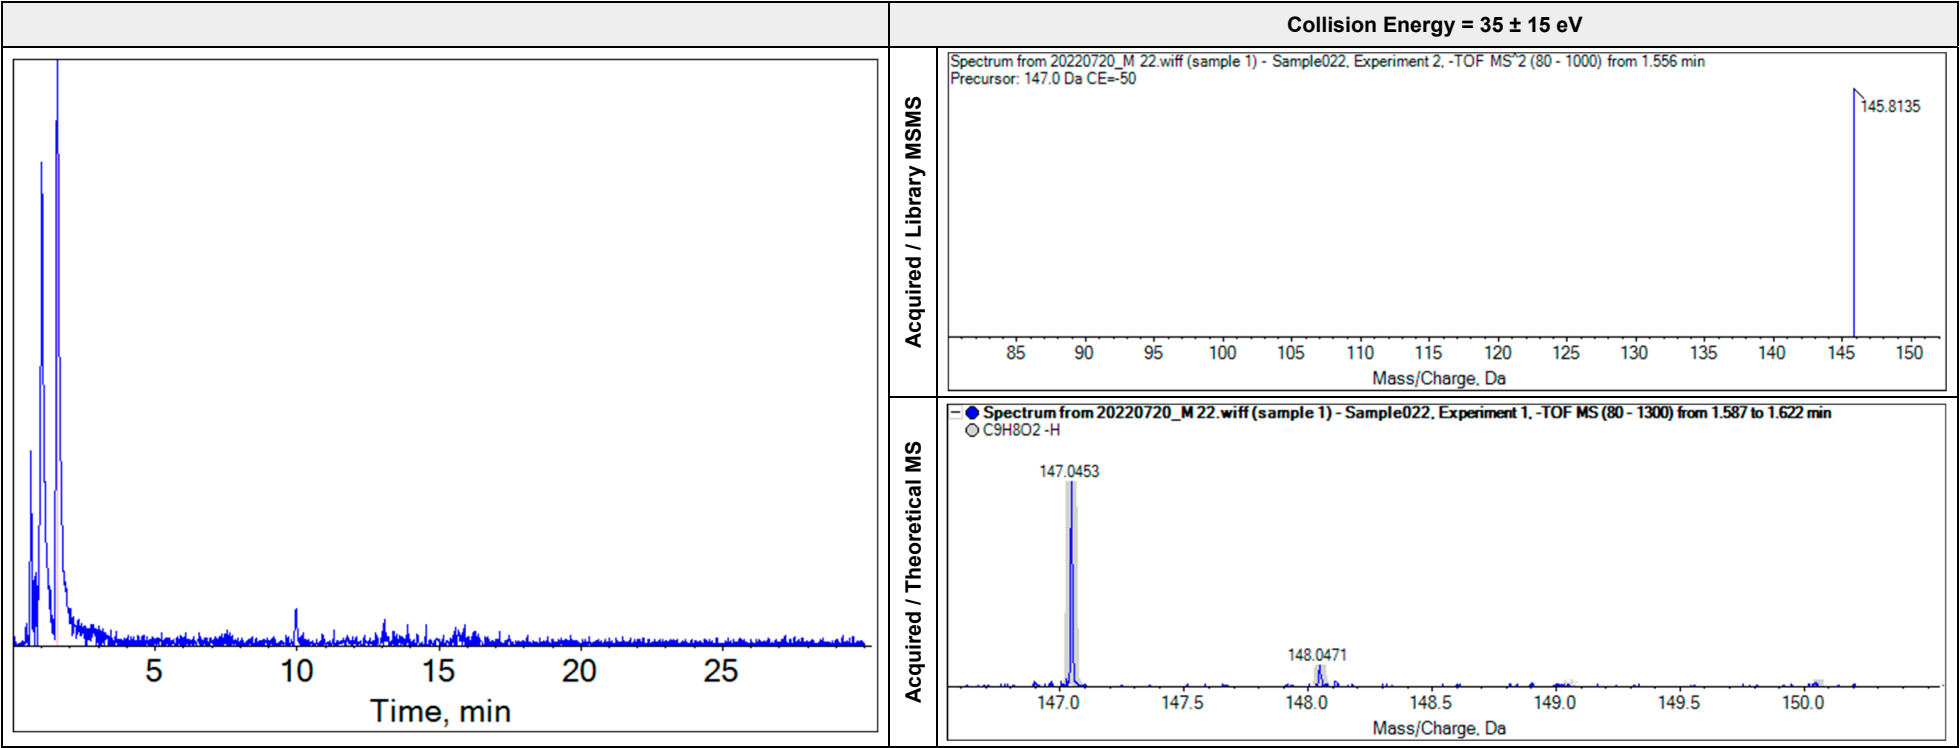

(C)

|                              |              |                               |  |
|------------------------------|--------------|-------------------------------|--|
| Retention Time: 1.58 minutes |              | Exp RT: 0.00 minutes          |  |
| Extraction Mass: 147.05      |              | Analyte Name:                 |  |
| Fit (%) N/A                  | RFit (%) N/A | Cinnamic acid                 |  |
|                              |              | Collision Energy = 35 ± 15 eV |  |

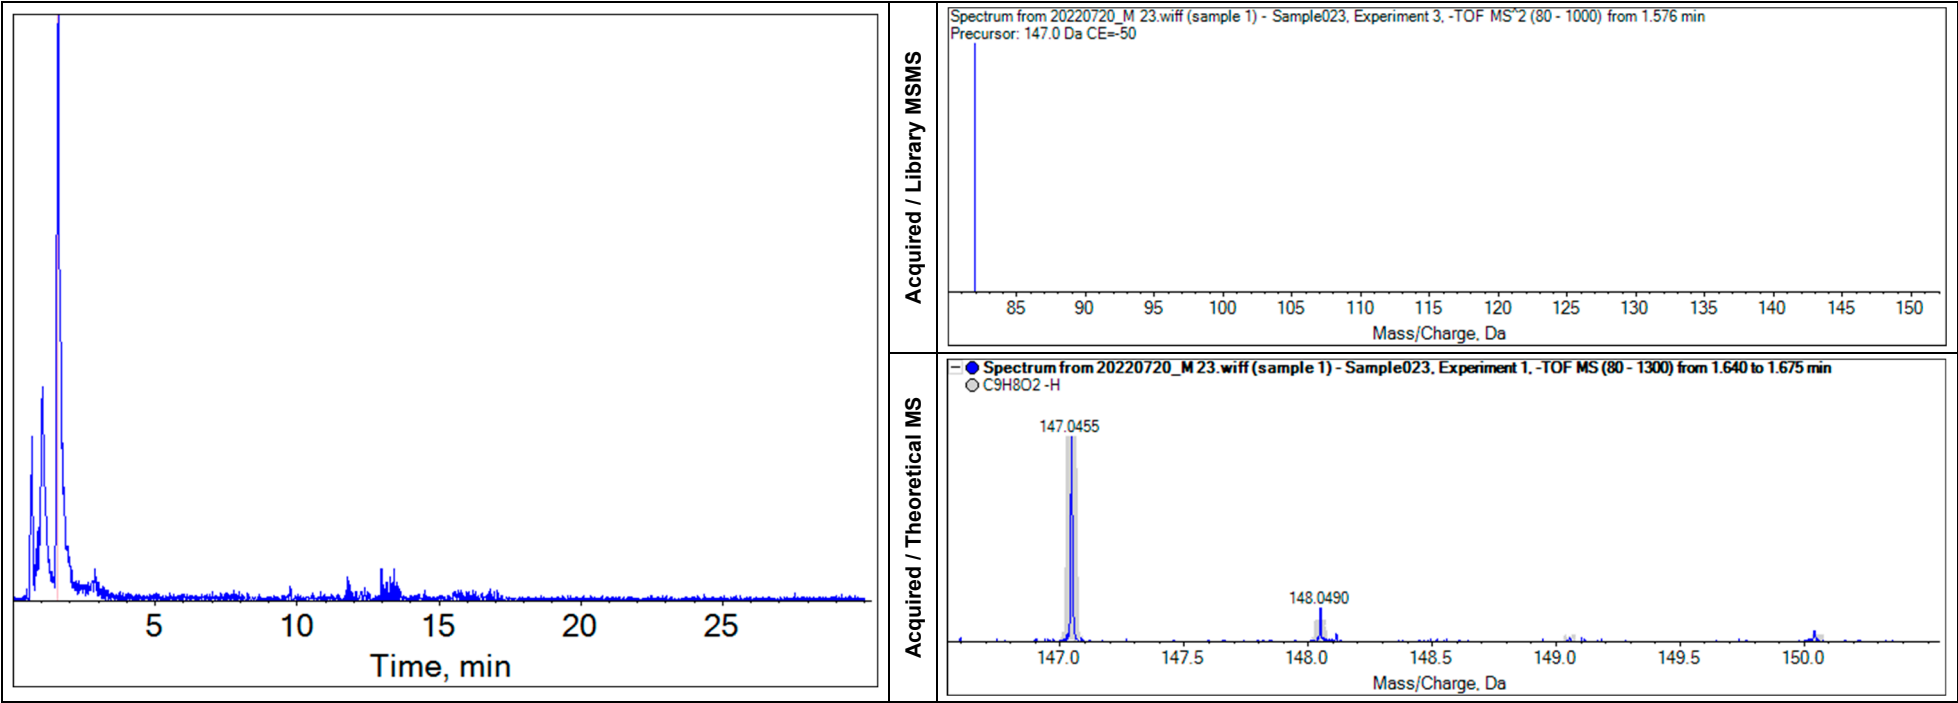

(D)

|                               |                      |
|-------------------------------|----------------------|
| Retention Time: 1.62 minutes  | Exp RT: 0.00 minutes |
| Extraction Mass: 147.05       | Analyte Name:        |
| Fit (%) N/A    RFit (%) N/A   | Cinnamic acid        |
| Collision Energy = 35 ± 15 eV |                      |

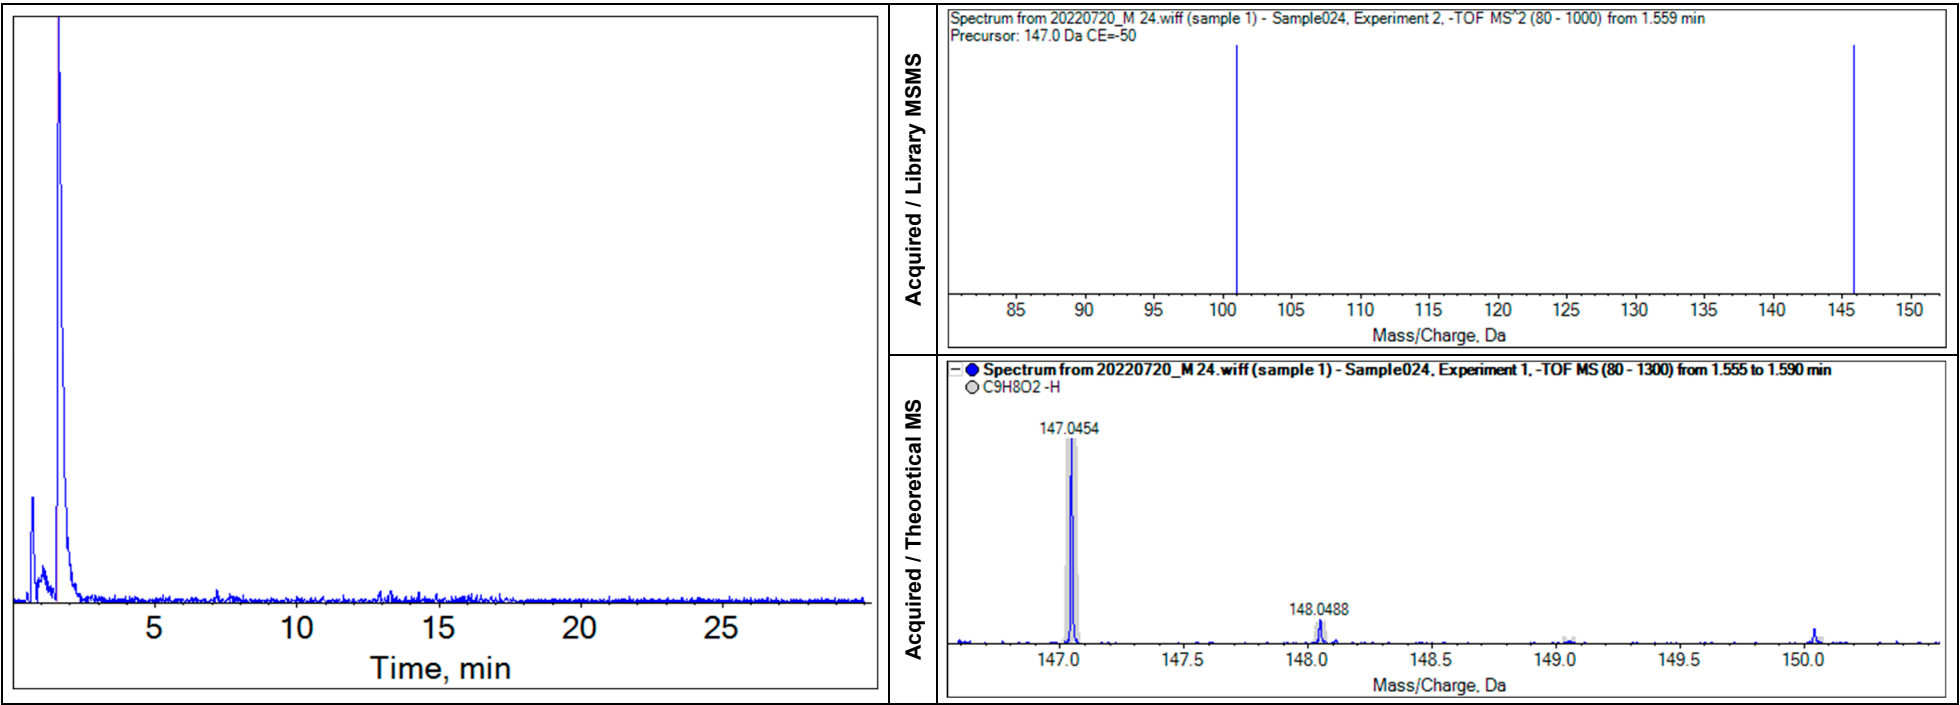

(E)

|                               |                      |
|-------------------------------|----------------------|
| Retention Time: 1.64 minutes  | Exp RT: 0.00 minutes |
| Extraction Mass: 147.05       | Analyte Name:        |
| Fit (%) N/A     RFit (%) N/A  | Cinnamic acid        |
| Collision Energy = 35 ± 15 eV |                      |

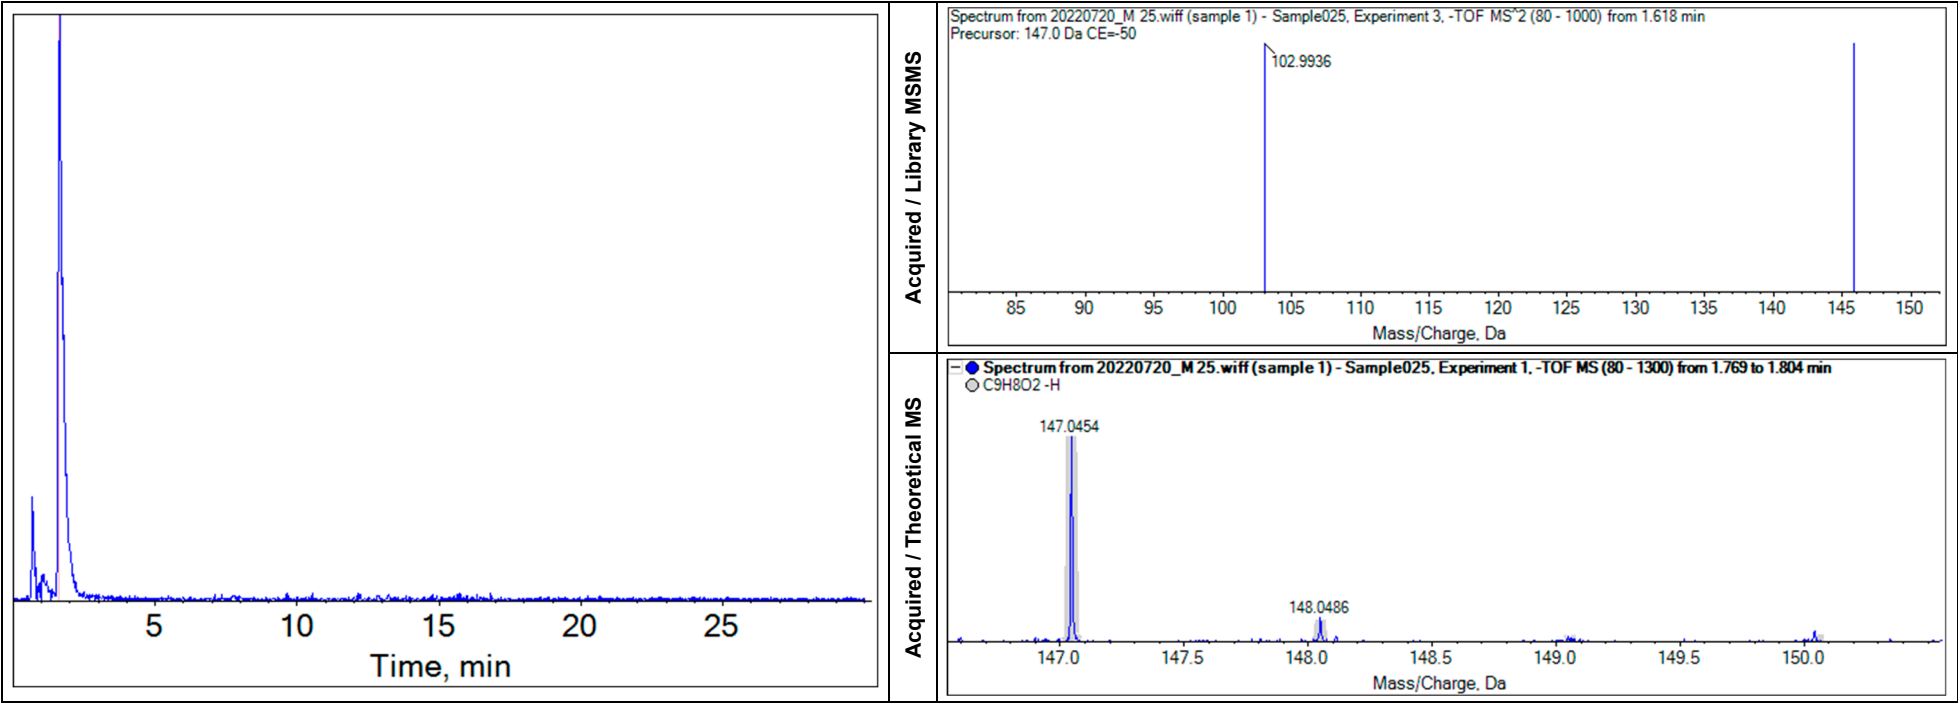

(F)

|                               |                      |
|-------------------------------|----------------------|
| Retention Time: 1.59 minutes  | Exp RT: 0.00 minutes |
| Extraction Mass: 147.05       | Analyte Name:        |
| Fit (%) N/A      RFit (%) N/A | Cinnamic acid        |
| Collision Energy = 35 ± 15 eV |                      |

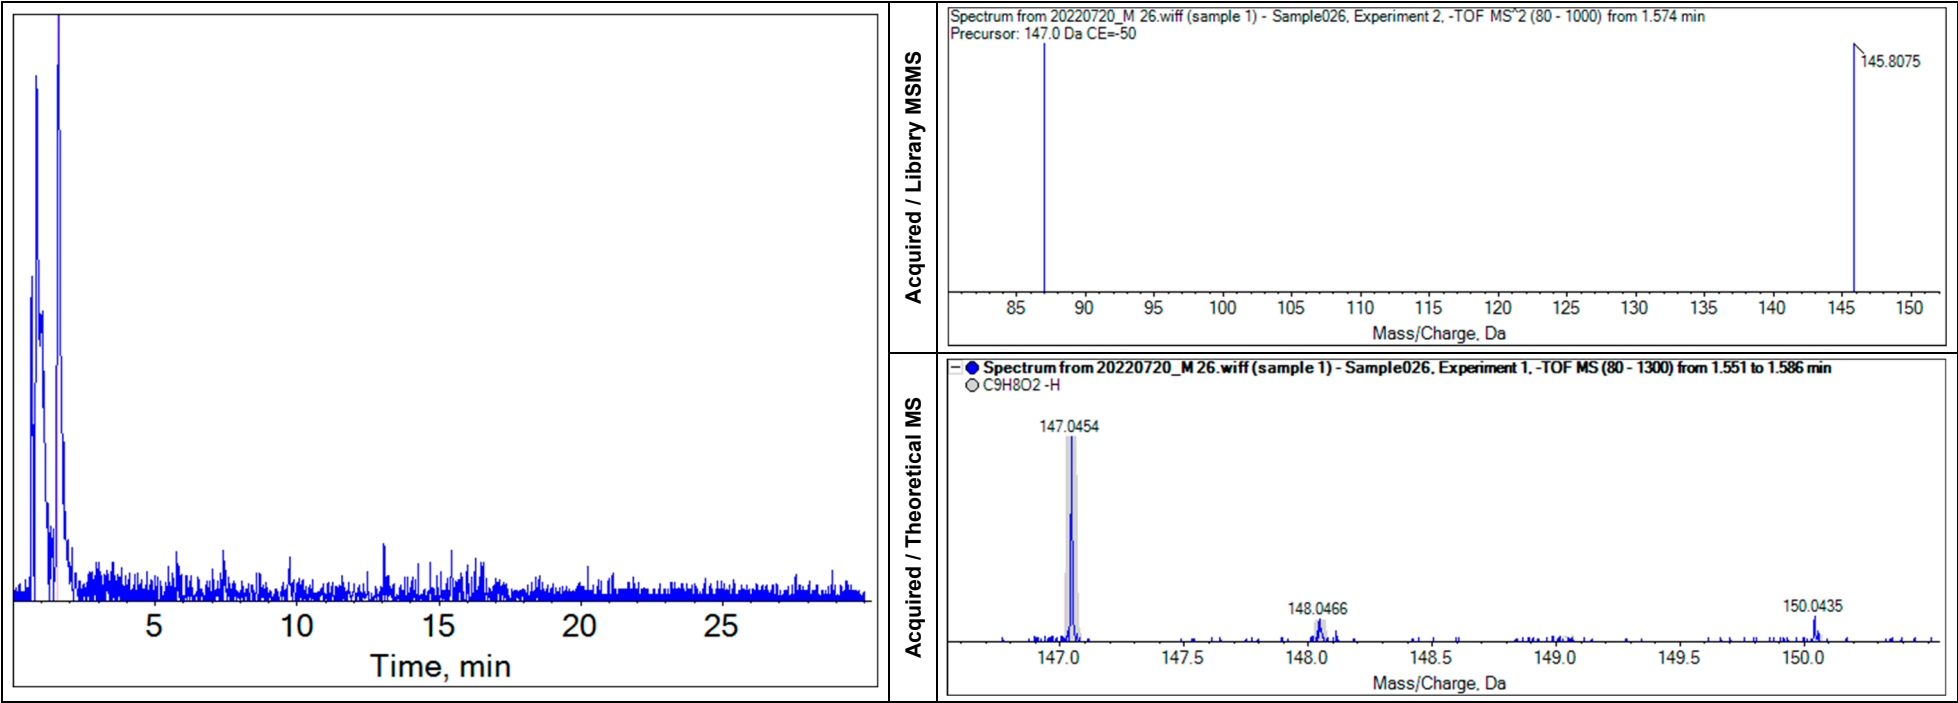

(G)

|                               |                      |
|-------------------------------|----------------------|
| Retention Time: 1.60 minutes  | Exp RT: 0.00 minutes |
| Extraction Mass: 147.05       | Analyte Name:        |
| Fit (%) N/A    RFit (%) N/A   | Cinnamic acid        |
| Collision Energy = 35 ± 15 eV |                      |

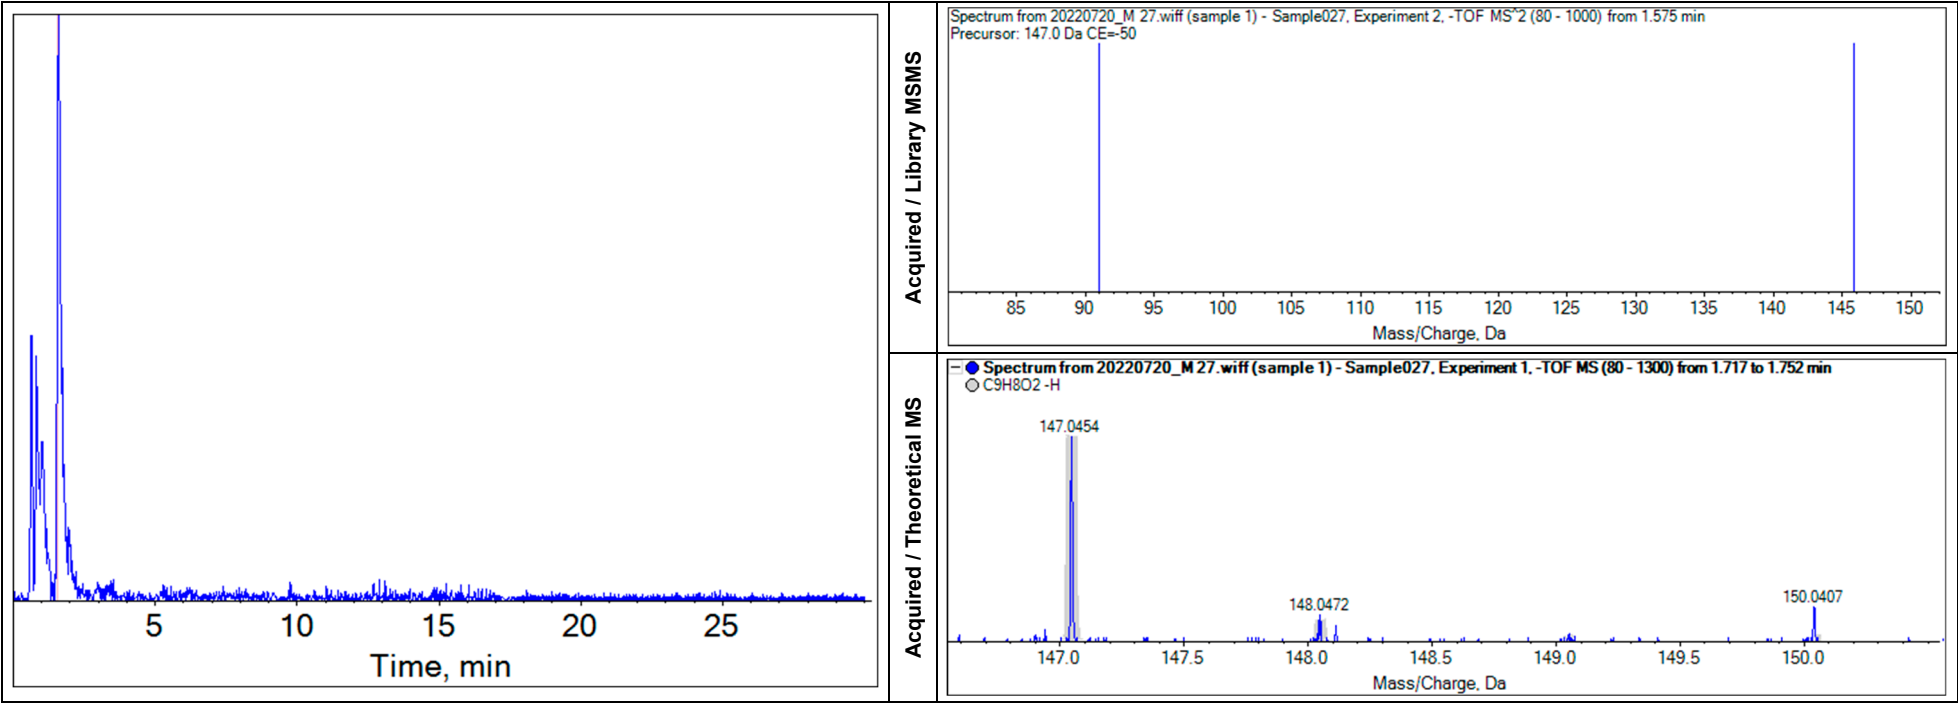

(H)

**Figure S2.** LC- MS/MS cinnamic acid chromatographs from (A) *A. brunnescens* conventional extract, (B) *A. brunnescens* PEF extract, (C) *P. ostreatus* conventional extract, (D) *P. ostreatus* PEF extract, (E) *A. bisporus* conventional extract, (F) *A. bisporus* PEF extract, (G) *L. edodes* conventional extract, (H) *L. edodes* PEF extract.

|                               |                      |
|-------------------------------|----------------------|
| Retention Time: 13.57 minutes | Exp RT: 0.00 minutes |
| Extraction Mass: 149.10       | Analyte Name:        |
| Fit (%) N/A      RFit (%) N/A | Thymol               |
| Collision Energy = 35 ± 15 eV |                      |

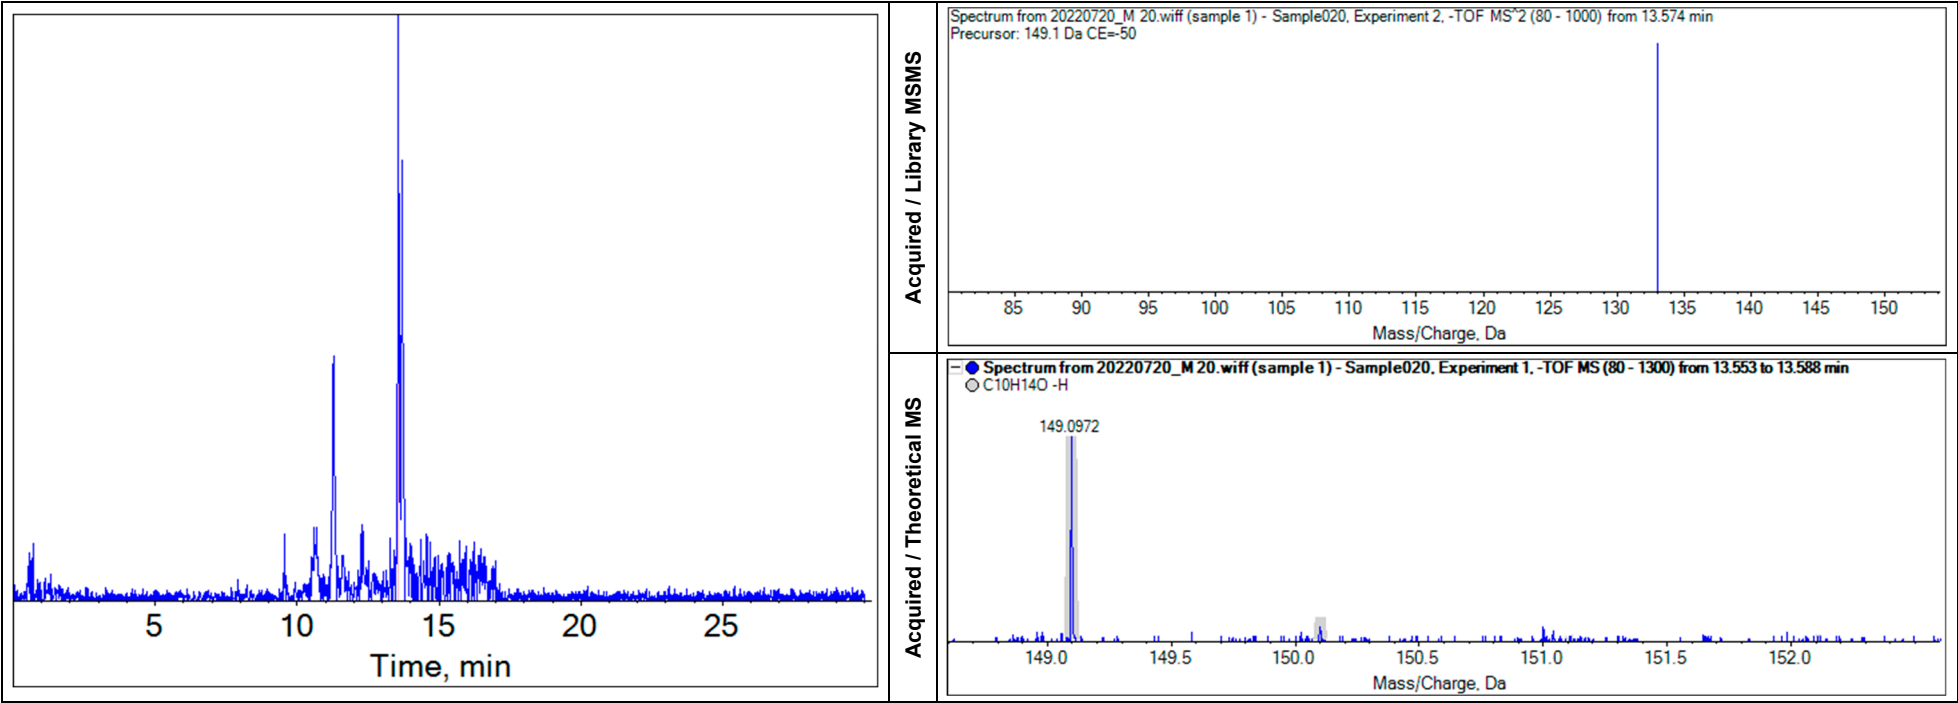

(A)

|                               |                      |
|-------------------------------|----------------------|
| Retention Time: 13.66 minutes | Exp RT: 0.00 minutes |
| Extraction Mass: 149.10       | Analyte Name:        |
| Fit (%) N/A      RFit (%) N/A | Thymol               |
| Collision Energy = 35 ± 15 eV |                      |

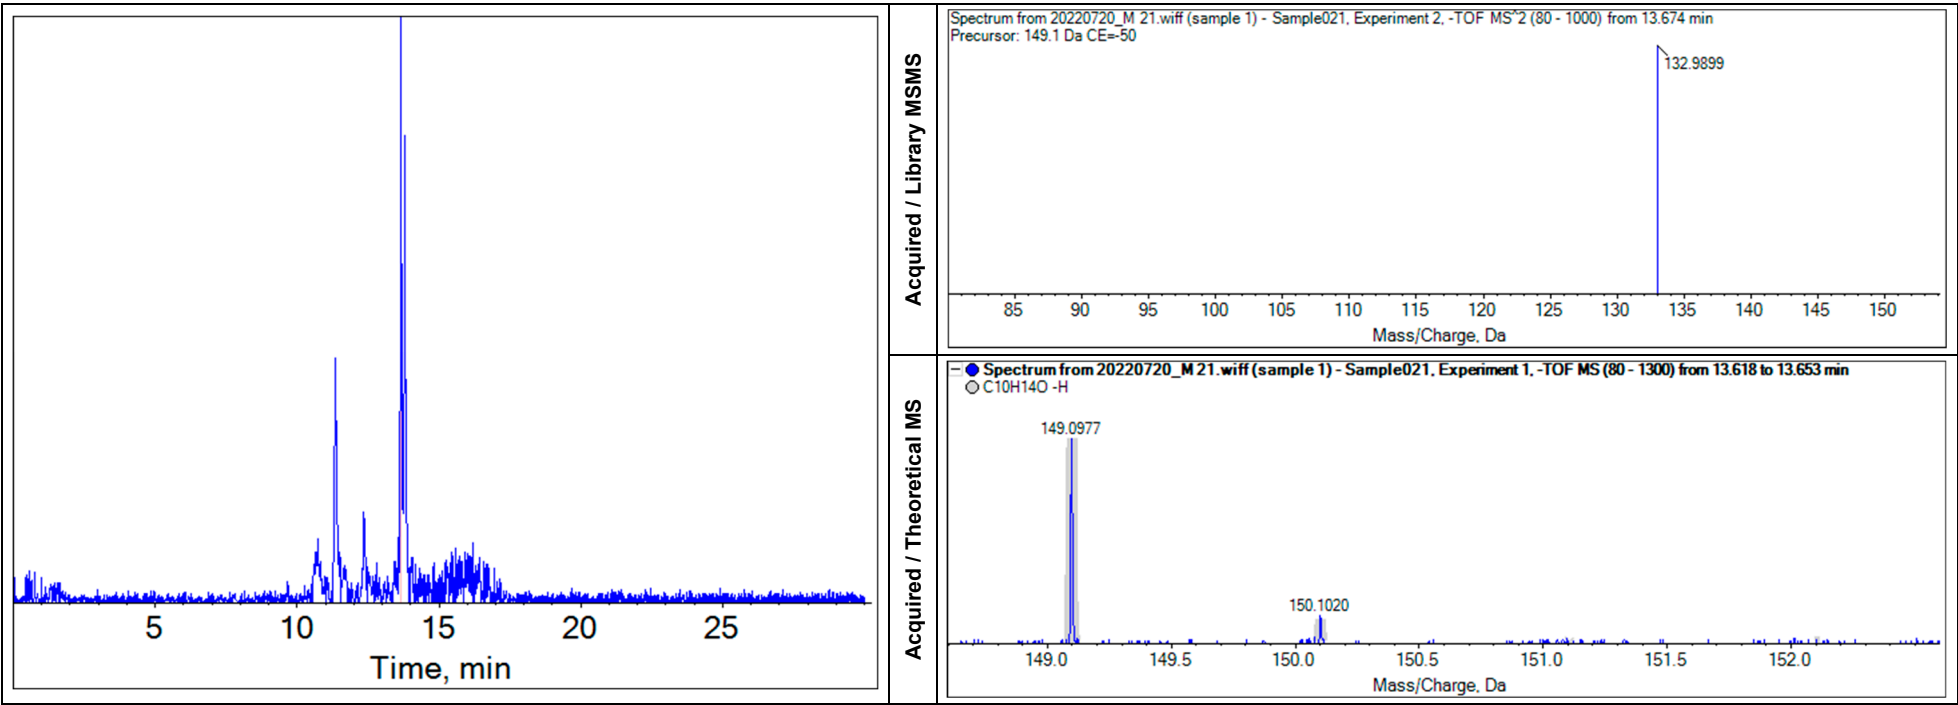

(B)

|                               |                      |
|-------------------------------|----------------------|
| Retention Time: 13.65 minutes | Exp RT: 0.00 minutes |
| Extraction Mass: 149.10       | Analyte Name:        |
| Fit (%) N/A      RFit (%) N/A | Thymol               |
| Collision Energy = 35 ± 15 eV |                      |



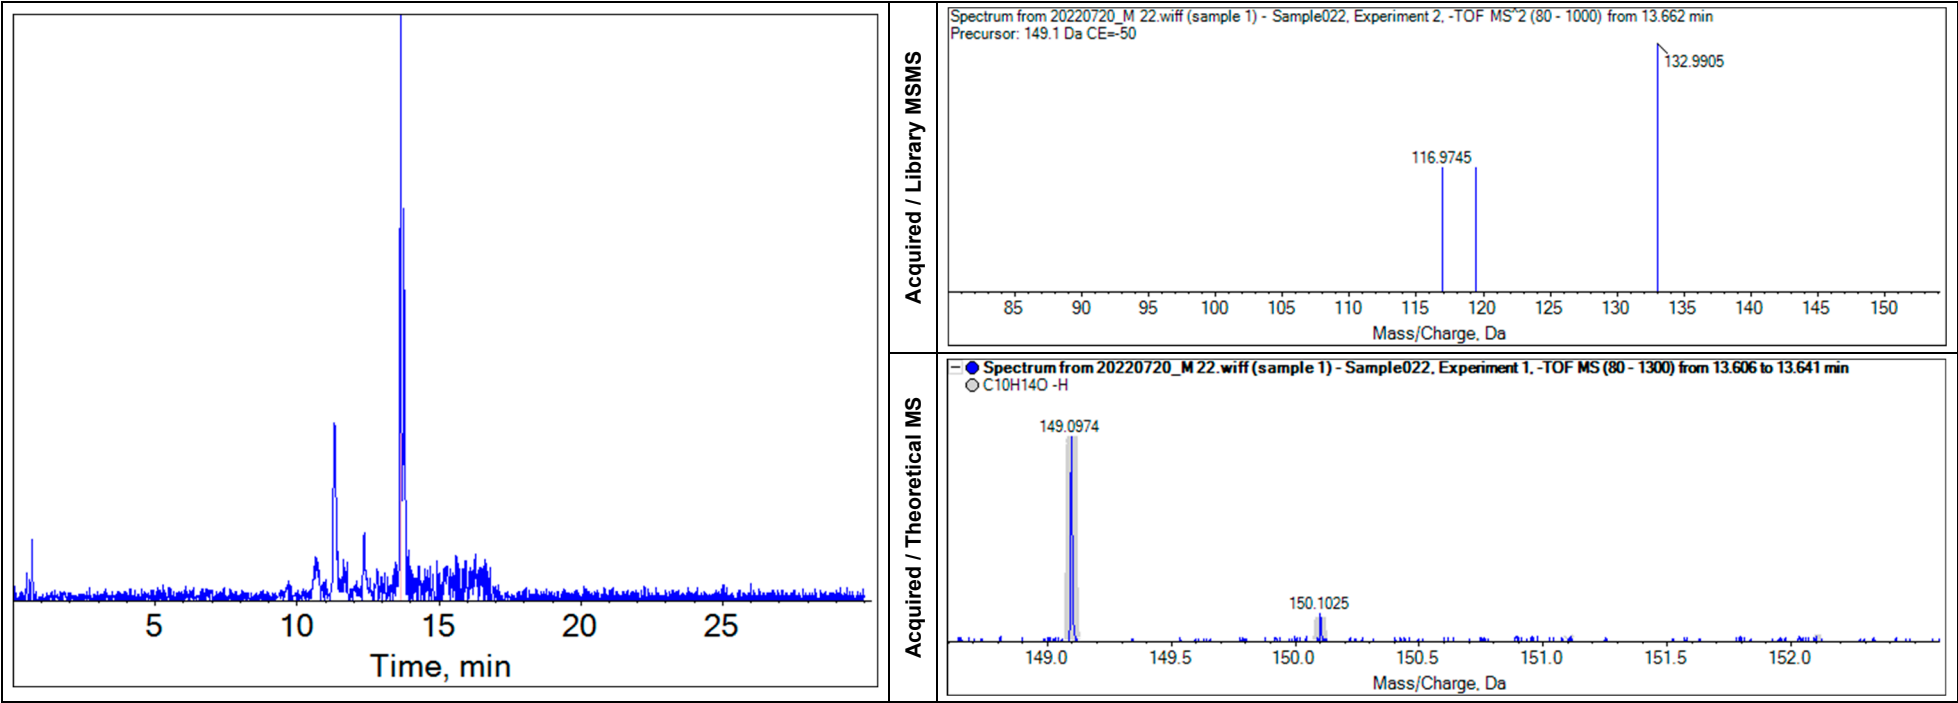

(C)

|                               |                      |
|-------------------------------|----------------------|
| Retention Time: 13.53 minutes | Exp RT: 0.00 minutes |
| Extraction Mass: 149.10       | Analyte Name:        |
| Fit (%) N/A      RFit (%) N/A | Thymol               |
| Collision Energy = 35 ± 15 eV |                      |

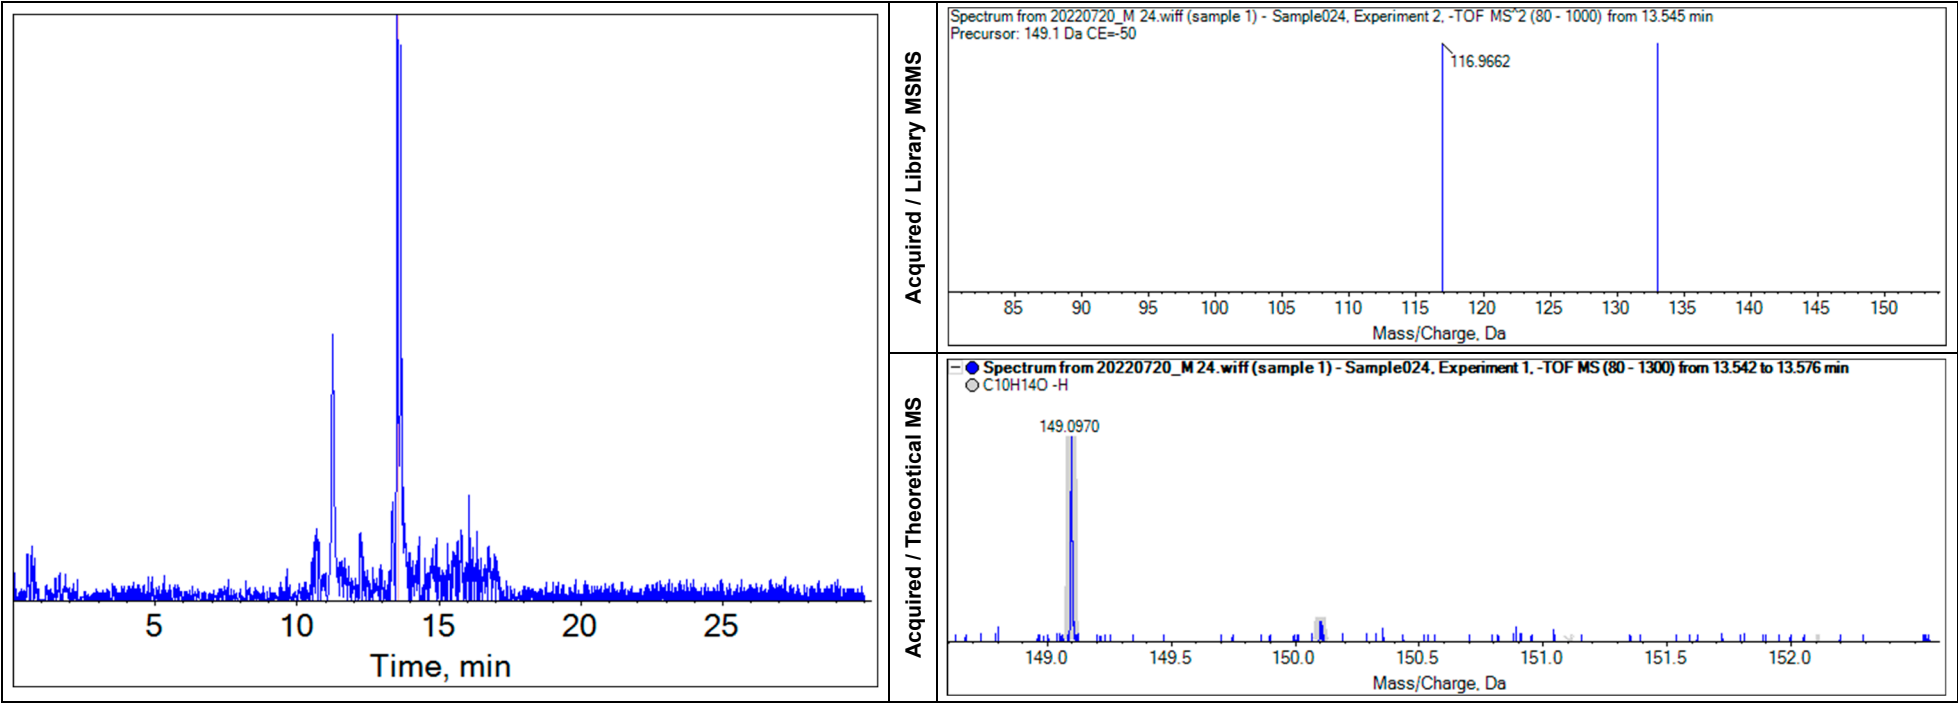

(D)

|                               |                      |
|-------------------------------|----------------------|
| Retention Time: 13.42 minutes | Exp RT: 0.00 minutes |
| Extraction Mass: 149.10       | Analyte Name:        |
| Fit (%) N/A    RFit (%) N/A   | Thymol               |
| Collision Energy = 35 ± 15 eV |                      |

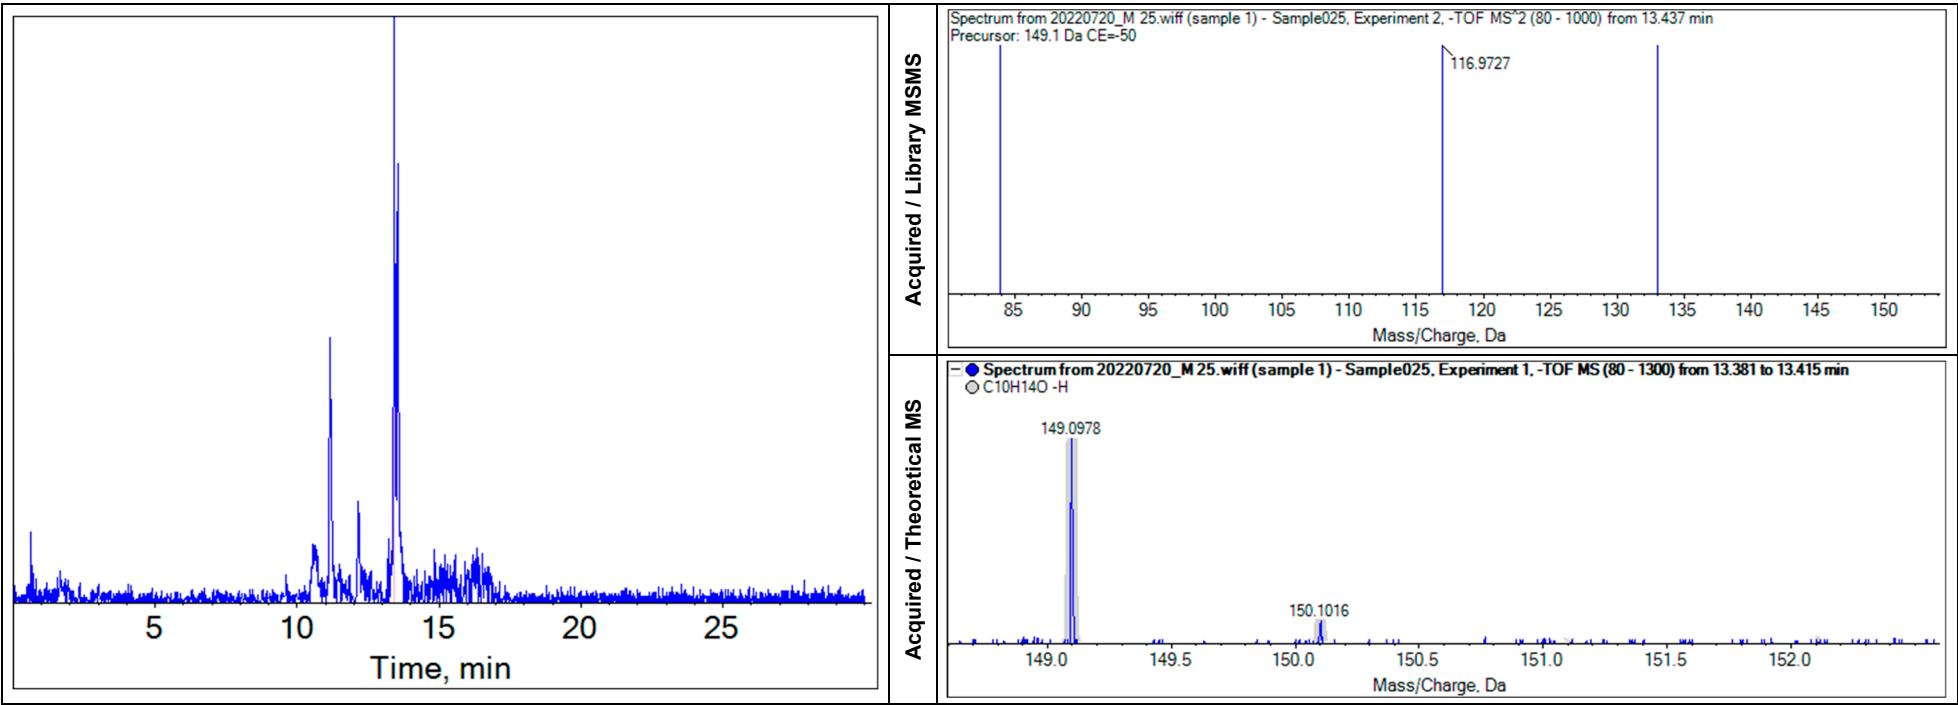

(E)

|                               |                      |
|-------------------------------|----------------------|
| Retention Time: 13.67 minutes | Exp RT: 0.00 minutes |
| Extraction Mass: 149.10       | Analyte Name:        |
| Fit (%) N/A      RFit (%) N/A | Thymol               |
| Collision Energy = 35 ± 15 eV |                      |

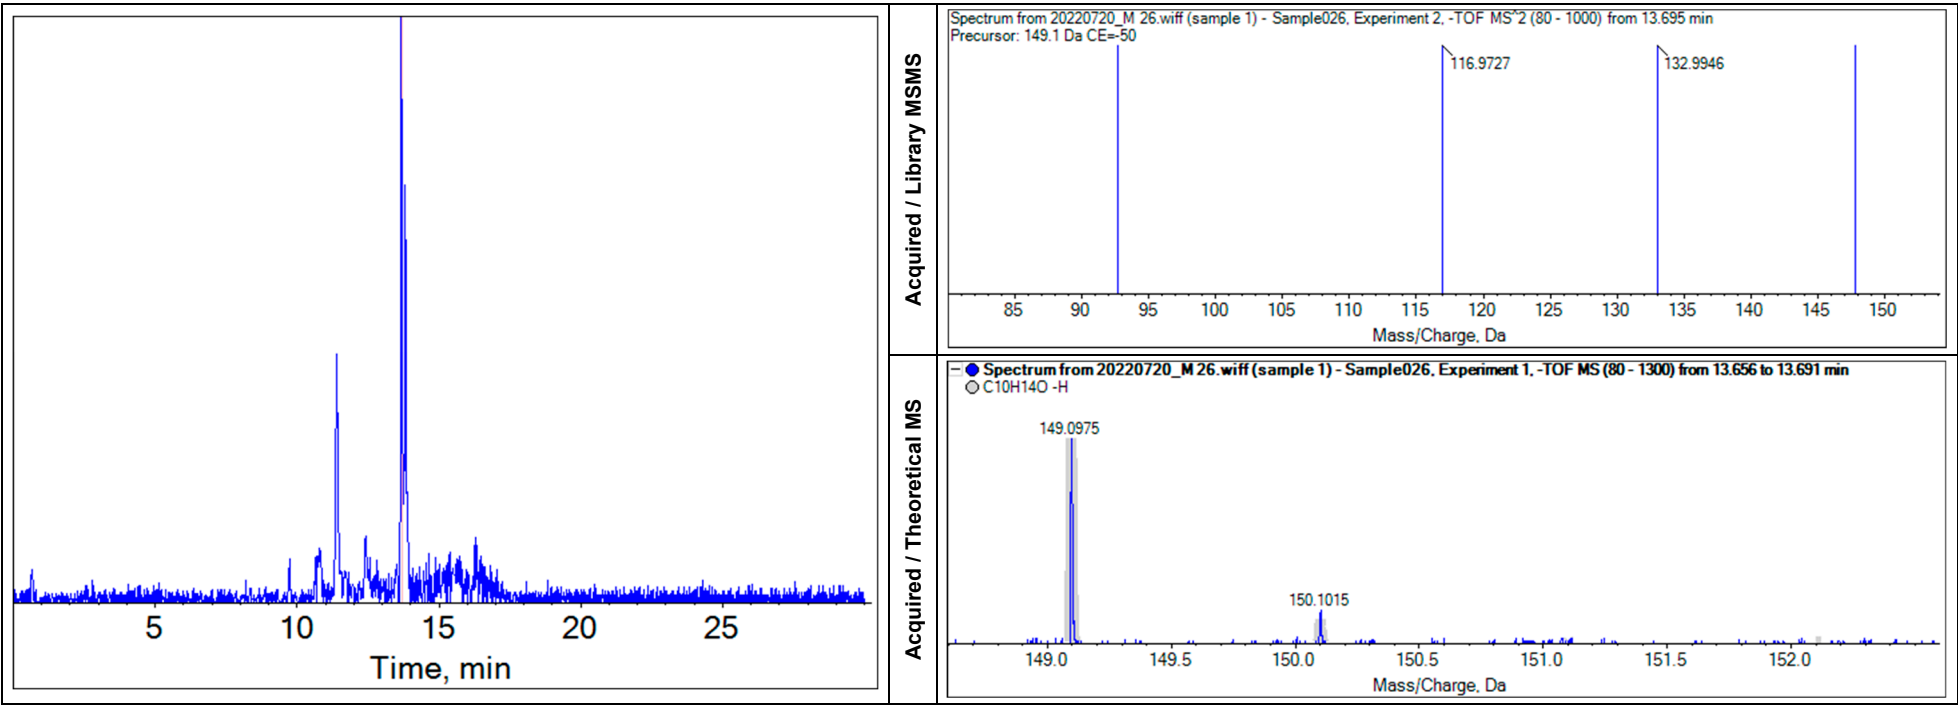

(F)

|                               |                      |
|-------------------------------|----------------------|
| Retention Time: 13.33 minutes | Exp RT: 0.00 minutes |
| Extraction Mass: 149.10       | Analyte Name:        |
| Fit (%) N/A     RFit (%) N/A  | Thymol               |
| Collision Energy = 35 ± 15 eV |                      |

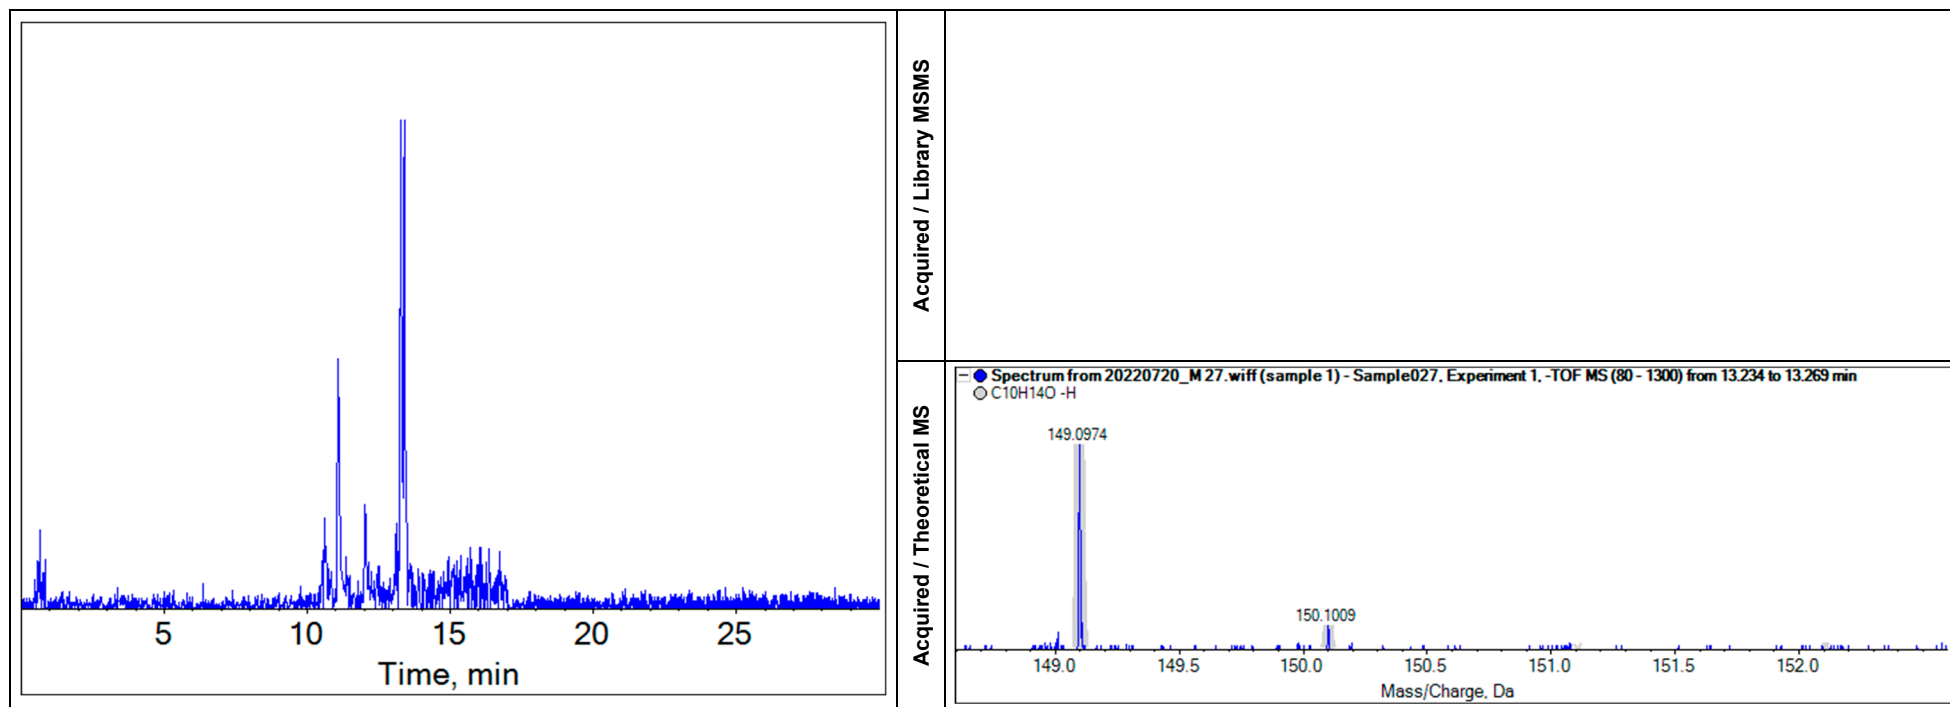

(G)

**Figure S3.** LC- MS/MS thymol chromatographs from (A) *A. brunnescens* conventional extract, (B) *A. brunnescens* PEF extract, (C) *P. ostreatus* conventional extract, (D) *A. bisporus* conventional extract, (E) *A. bisporus* PEF extract, (F) *L. edodes* conventional extract, (G) *L. edodes* PEF extract.

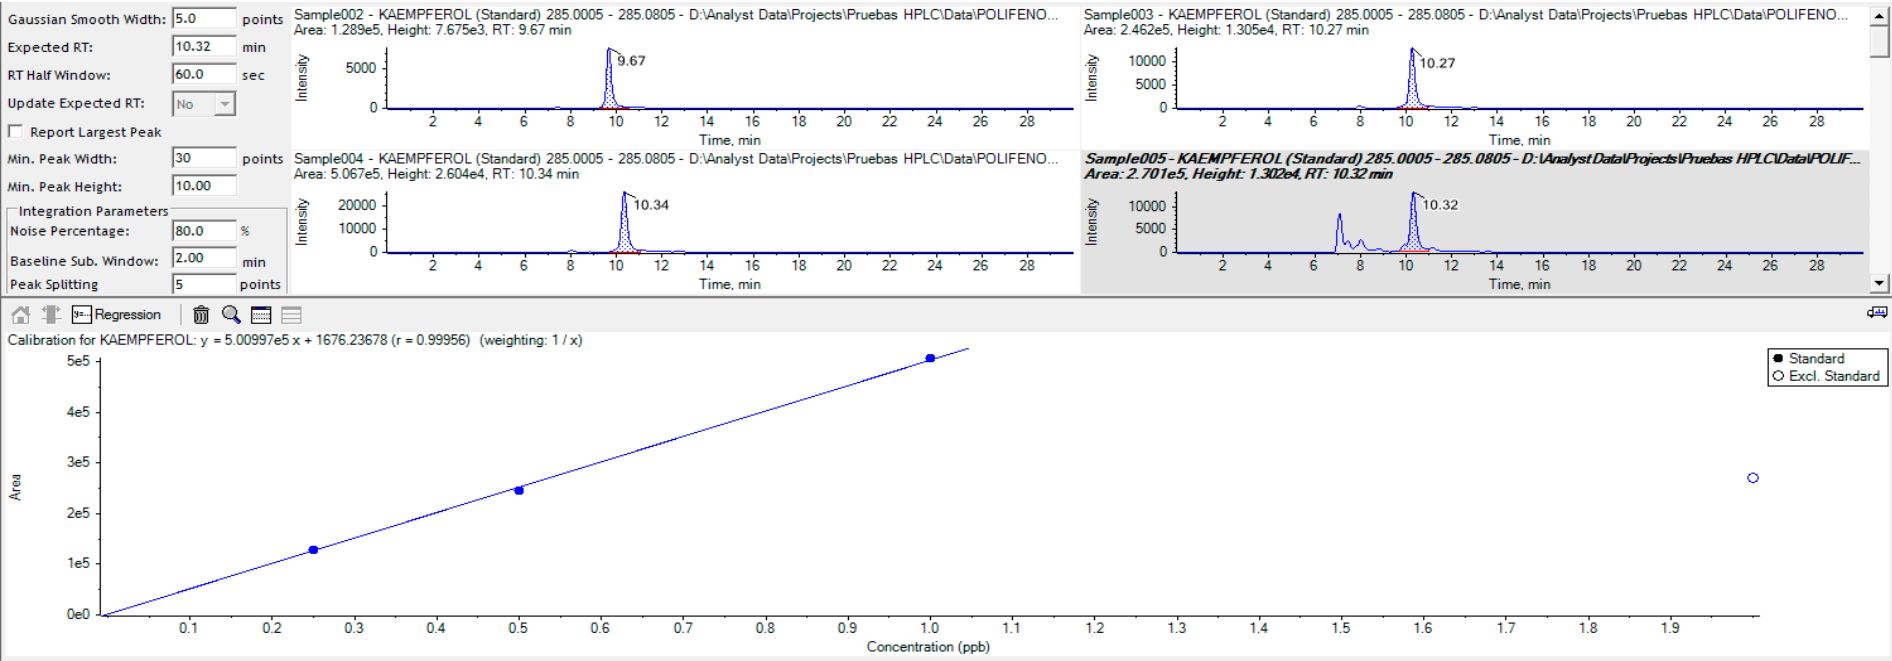

(A)

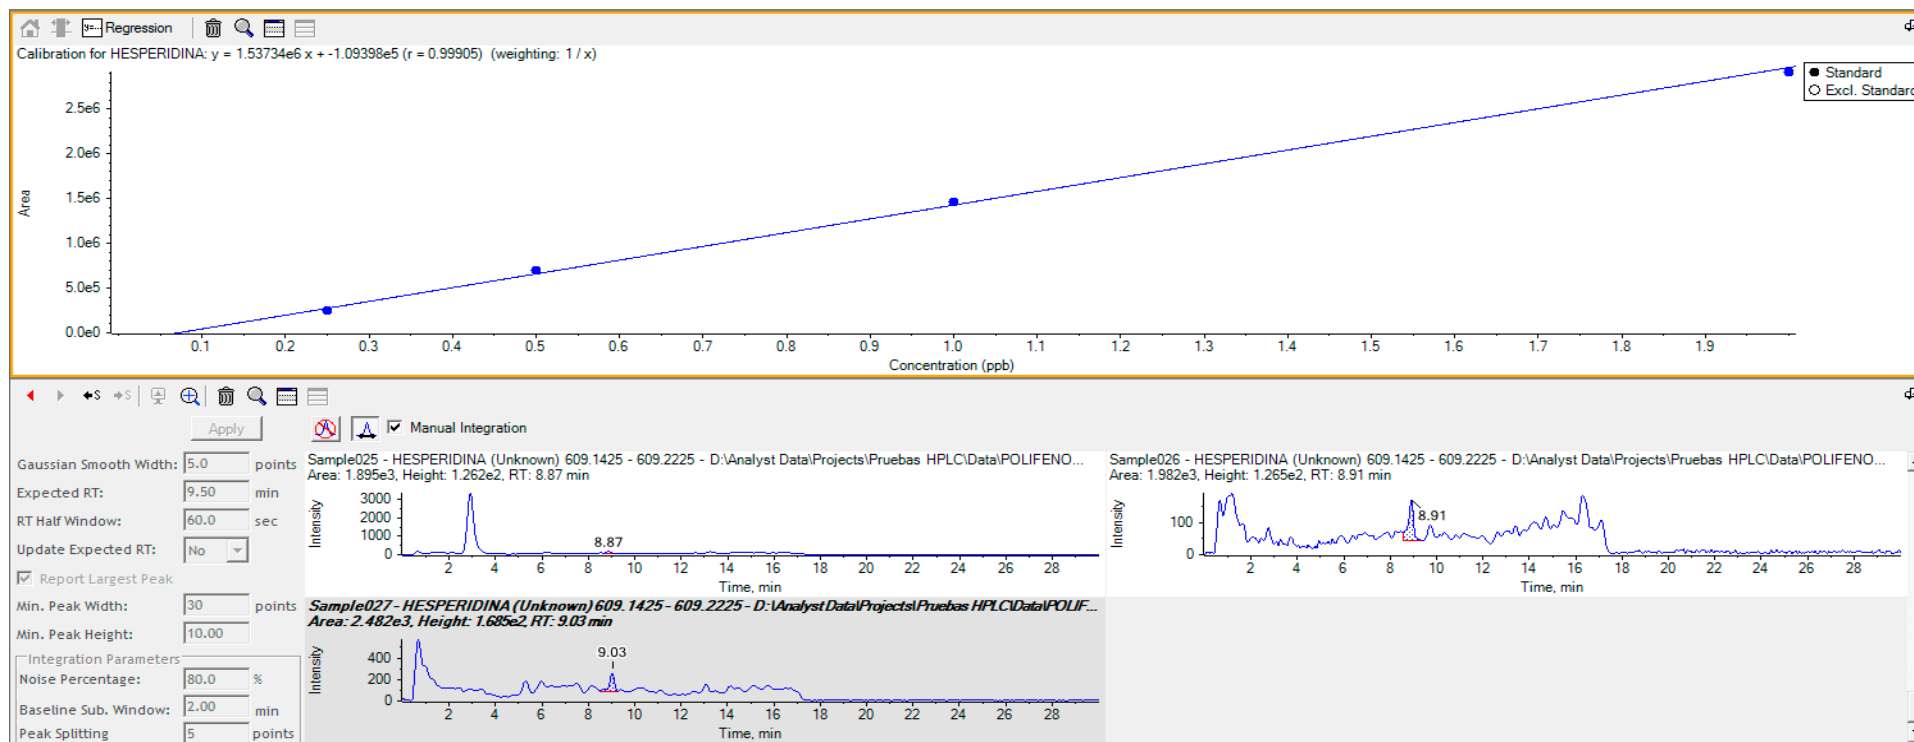

(B)

Figure S4. LC- MS/MS standard calibration of (A) Kaempferol and (B) Hesperidin with sample data showed below.

**Author Contributions:** Conceptualization, Mara Calleja-Gómez, Patricia Roig, Suzana Rimac-Brnčić, Francisco J. Barba and Juan Manuel Castagnini; Data curation, Mara Calleja-Gómez, Patricia Roig and Juan Manuel Castagnini; Formal analysis, Mara Calleja-Gómez and Patricia Roig; Funding acquisition, Francisco J. Barba; Investigation, Mara Calleja-Gómez; Methodology, Patricia Roig, Suzana Rimac-Brnčić, Francisco J. Barba and Juan Manuel Castagnini; Project administration, Francisco J. Barba; Resources, Francisco J. Barba and Juan Manuel Castagnini; Supervision, Francisco J. Barba and Juan Manuel Castagnini; Validation, Patricia Roig, Suzana Rimac-Brnčić, Francisco J. Barba and Juan Manuel Castagnini; Visualization, Patricia Roig, Suzana Rimac-Brnčić and Juan Manuel Castagnini; Writing – original draft, Mara Calleja-Gómez; Writing – review & editing, Mara Calleja-Gómez, Patricia Roig, Suzana Rimac-Brnčić, Francisco J. Barba and Juan Manuel Castagnini.

**Funding:** This research was supported by the Spanish Ministry of Science and Innovation project (PID2021-123628OB-C42 - Eco-innovative extraction of nutrients and bioactive compounds from agri-food co-products for the design of healthier foods. Study of biological activities), which is funded by MCIN/AEI/10.13039/501100011033/ and FEDER, UE.

**Institutional Review Board Statement:** Not applicable.

**Informed Consent Statement:** Not applicable.

**Data Availability Statement:** The data presented in this study are available on request from the corresponding author.

**Acknowledgments:** Juan Manuel Castagnini is beneficiary of the grant (ZA21-028) for the requalification of the Spanish university system from the Ministry of Universities of the Government of Spain, modality “Maria Zambrano”, financed by the European Union, NextGeneration EU through the project “Extraction of bioactive compounds from food matrices using innovative and sustainable technologies (EXTRABIO)”. The authors would also like to thank the project OTR2022-22807INVE as well as the help provided by the Laboratories of Central Support Service for Experimental Research (SCSIE)— University of Valencia for technical support in LC / MS / MS analysis for phenolic profile determination and SEM microscopy.

**Conflicts of Interest:** The authors declare no conflict of interest.
